# Supplementary material for: Network organization of the human autophagy system
Source: Springer Nature journal article supplement (doi:10.1038/nature09204), 2010-06-20
Supplement: 41586_2010_BFnature09204_MOESM101_ESM.pdf [file 41586_2010_BFnature09204_MOESM101_ESM.pdf]

## Part 1. Supplementary Methods

**Data Processing and Analysis.** Mass spectral data was processed using *CompPASS*, as previously described<sup>1</sup> with modifications discussed below. Briefly, Sequest summary files were processed into a high threshold dataset based on a 2% protein false-positive rate by keeping the XCorr thresholds for each charge state constant while varying the  $\Delta Cn$  (thresholds: XCorr 2+  $\geq$  2.5; XCorr 3+  $\geq$  3.2; XCorr 4+  $\geq$  3.5; +1 charge states were not collected). These processed data sets were merged for each duplicate run and used to populate a “stats table” consisting of each dataset for the AIN as well as 102 unrelated proteins (Dubs and their selected HCIPs<sup>1</sup>; [https://harper.hms.harvard.edu/CompPASS\\_Dubs.html](https://harper.hms.harvard.edu/CompPASS_Dubs.html)). The D<sup>N</sup>-score and Z-score are calculated from total spectral counts (TSCs) for each protein found in association with each bait.

Because *CompPASS* was originally designed for analysis of mostly non-reciprocal datasets, we devised a new weighted D<sup>N</sup>-score (WD<sup>N</sup>-score) (Supplementary Fig. S2), which aids in the identification of HCIPs that are associated with multiple baits in a network. WD<sup>N</sup>-scores were calculated as:

$$WD_{i,j} = \sqrt{(\lambda \omega_j)^p (x_{i,j})} \quad (\text{Eq. 1})$$

$$\lambda = \left( \frac{k}{\sum_{i=1}^{i=k} f_{i,j}} \right), \quad f_{i,j} = \begin{cases} 1; & X_{i,j} > 0 \\ X_{i,j} & \end{cases} \quad (\text{Eq. 2})$$

$$\omega_j = \left( \frac{\sigma_j}{\bar{X}_j} \right), \quad \bar{X}_j = \frac{\sum_{i=1, i \neq n}^{i=k} X_{i,j}}{k}; \quad n = 1, 2, \dots, m \quad (\text{Eq. 3})$$

$X_{i,j}$  = total peptides for interactor  $j$  from bait  $i$

$$p = \begin{cases} \text{number of replicates} \\ \text{runs in which} \\ \text{the interactor is present} \end{cases}$$

where  $\omega_j$  is the weight factor for interactor  $j$  (Eq. 3),  $\sigma_j$  is the standard deviation of the TSCs for interactor  $j$  and the raw WD-score is divided by the threshold WD-score determined in the same manner as for the D-score described previously<sup>1</sup>. The previously described D-score is Eq. 1 without  $\omega_j$ . The analyzed files, the primary output from *CompPASS*, were used for all analysis described here. As described below, we found significant interconnectivity in the network. Proteins identified in each LC-MS/MS experiment with a WD<sup>N</sup>-scores  $\geq$  1 and a p-value  $\leq$   $4.9 \times 10^{-6}$  are considered HCIPs.

### Comparison of HCIP abundance.

In order to compare the abundance of HCIPs found in the wild type and mutant ATG8 protein IP-MS/MS experiments we used the normalized spectral abundance factor (NSAF) approach previously applied to determine the abundance of proteins found in IP-

MS/MS datasets<sup>2</sup>. For each interactor in each IP-MS/MS experiments, the NSAF was calculated and then difference in NSAF values for that protein in wild type control and mutant experiment was determined. In order to plot the data using the  $\log_2$  values of this difference while maintaining the proper sign of the value (positive for increase and negative for decrease), the conventional NSAF was multiplied by 100,000 so that each value was  $\geq 1$  before taking the  $\log_2$  of the difference.

### ***Gene Ontology Analysis of the AIN and ATG8 networks.***

Gene Ontology (GO) process analysis was performed on both the HCIPs ( $WD^N$ -score > 1.0) from the AIN and separately for the HCIPs from the ATG8 sub network using in-house software. GO process terms were manually grouped into 25 broad categories for simplicity (Supplemental Table S7). HCIPs from each IP-MS/MS experiment were assigned a broad GO category where a single HCIP could have multiple category assignments, but only 1 per category. A final table of broad GO terms (Using the March 6, 2010 release) and their percentage found across all HCIPs was generated. This was repeated for non-HCIP proteins as well and was used to generate a mean and standard deviation for each broad GO category, representing the values found for each in the background protein dataset. GO term values for HCIPs were compared to these background values and p-values were calculated (Supplemental Fig. S5a). We feel that this method better reflects the enrichment of GO terms in our data rather than using the distributions for GO terms found across the entire human proteome because our IP-MS/MS procedure does not truly randomly sample all proteins in the proteome. Indeed, inspection of GO enrichment for background proteins shows that GO terms relating to canonical background proteins (such as “folding”, “translation”, and “cytoskeleton”) are significantly enriched in our background data when compared to the expected values for the human proteome (Supplemental Fig. S5a).

## References

1. Sowa, M. E., Bennett, E. J., Gygi, S. P. & Harper, J. W. Defining the human deubiquitinating enzyme interaction landscape. *Cell* 138, 389-403 (2009).
2. Sardiú, M. E. et al. Probabilistic assembly of human protein interaction networks from label-free quantitative proteomics. *Proc Natl Acad Sci U S A* 105, 1454-1459 (2008).

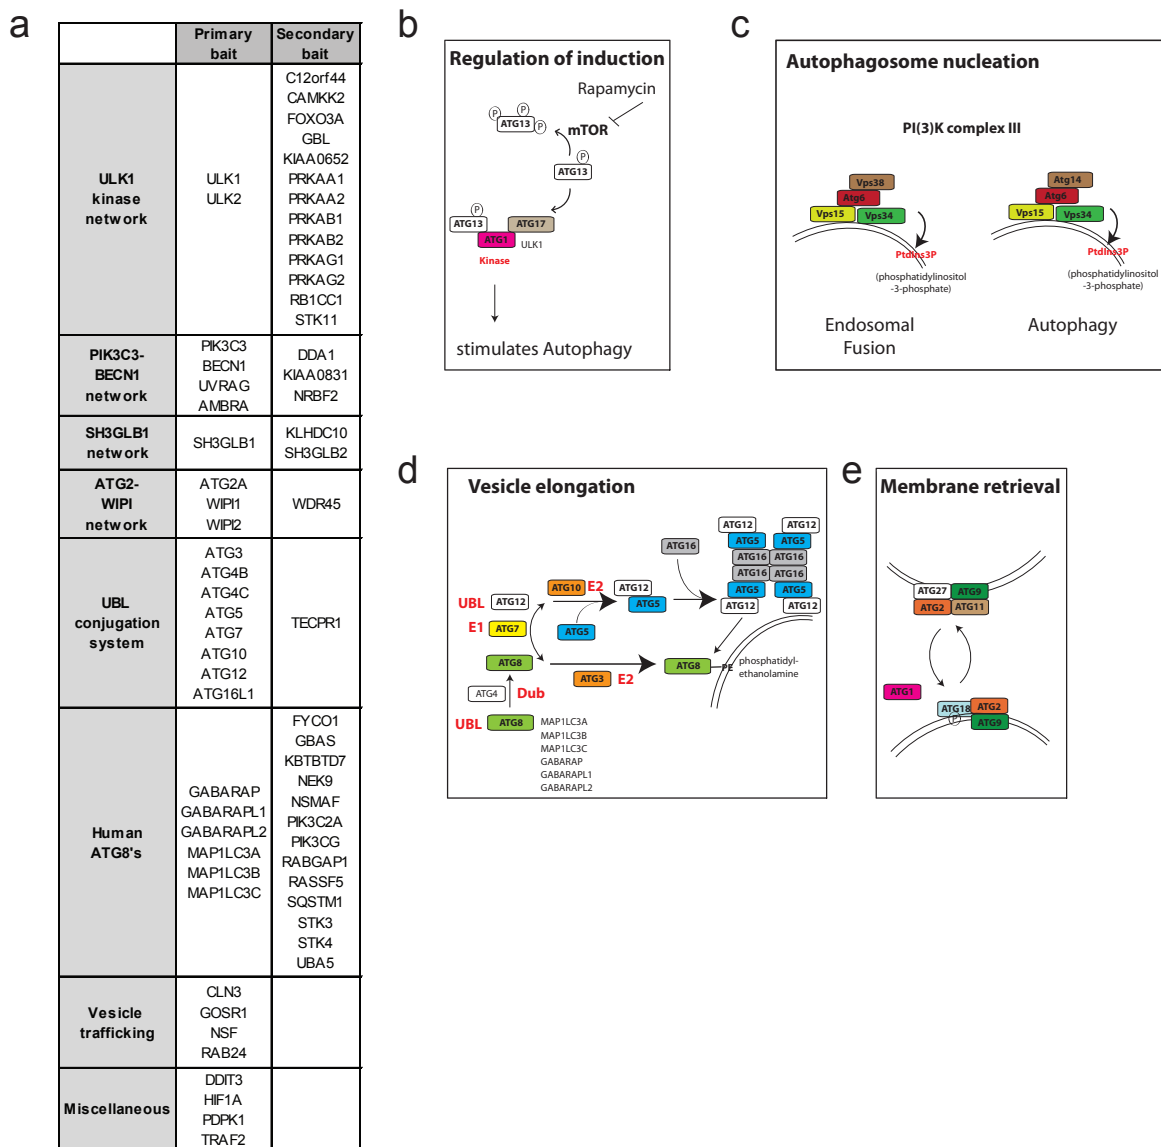

**Figure S1. Autophagy proteins and yeast autophagy signaling modules.** **a**, Primary and secondary baits examined in this study organized by functional class. **b-e**, Diagrams of central signaling pathways in the autophagy system in budding yeast, including the Atg1 pathway (**b**), the Vps34 lipid kinase pathway (**c**), the UBL (Atg8/Atg12) conjugation pathway (**d**), and the vesicle recycling complex involving the transmembrane protein Atg9 and the peripheral membrane proteins Atg18, Atg2, and Atg27 (**e**). Yeast proteins are indicated by symbols. Mammalian orthologs for Atg8 are indicated. Adapted from: Levine, B. and Kroemer, G. (2008) *Cell* 132, 161.



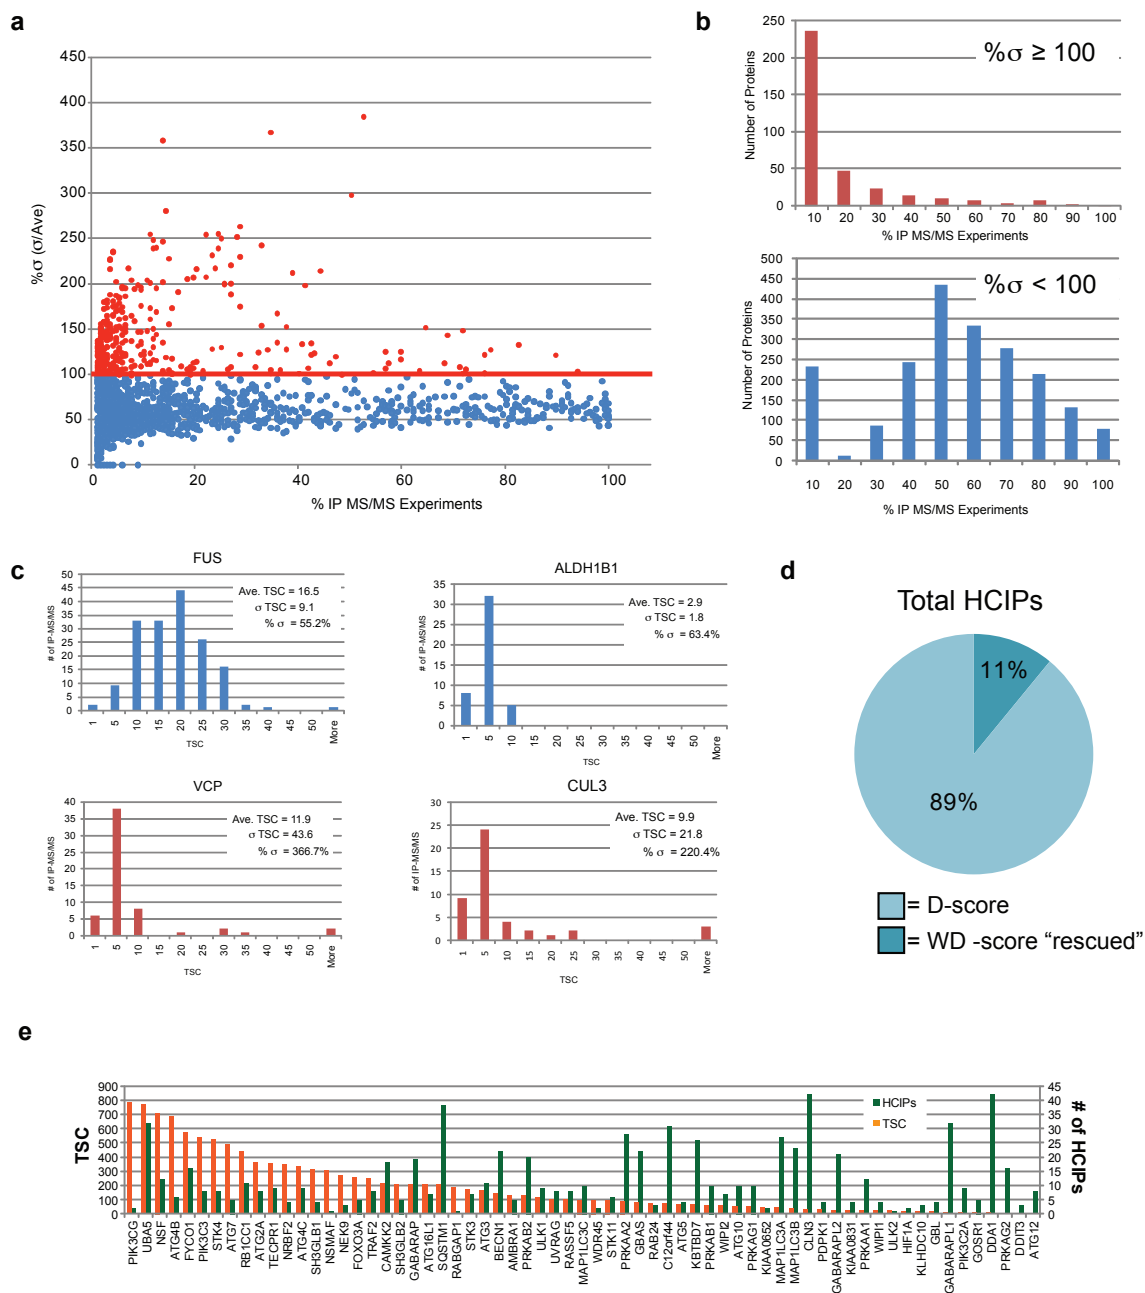

**Figure S2. Development of a weighted  $D^N$ -score for analysis of proteomic data within a collection of overlapping sub-networks.** To better determine likely interacting proteins that are abundant across IP-MS/MS datasets, we developed a weighted  $D^N$ -score ( $WD^N$ -score) based on the observation that the standard deviation of the TSCs for known common interactors was much higher than that of known background proteins (expressed as  $\% \sigma$  in panel **a**) (see Detailed Methods). **b**, A closer look at the distribution of proteins with  $\% \sigma \geq 100\%$  versus those with  $\% \sigma < 100\%$  shows that proteins in this former category are rarely found in multiple IP-MS/MS experiments. **c**, Examples of proteins known to be background (FUS and ALDH1B1) versus proteins known to be true interactors (VCP and CUL3) shows the differences in the TSC distributions and the large  $\% \sigma$  for the known interactors. **d**, Incorporating this information into the weighted  $D^N$ -score (see Detailed Methods) allows for 11% more proteins to be considered HCIPs versus using the previously describe  $D^N$ -score<sup>1</sup> indicating that most abundant proteins remain designated as background. **e**, The total spectral counts (orange) for autophagy network bait proteins are plotted together with the number of HCIPs for each bait (in green) based on  $WD^N$ -score.

**a All interacting proteins**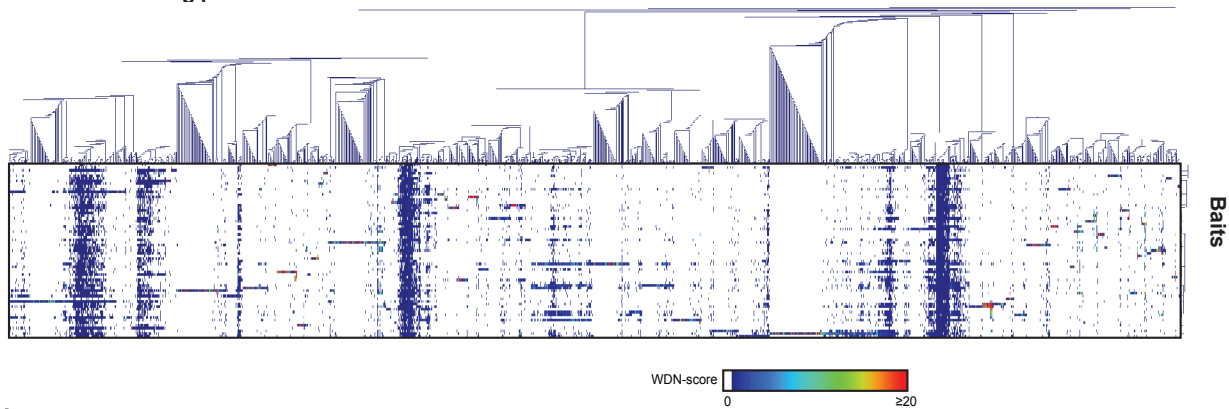**b High-confidence interacting proteins (HCIPs)**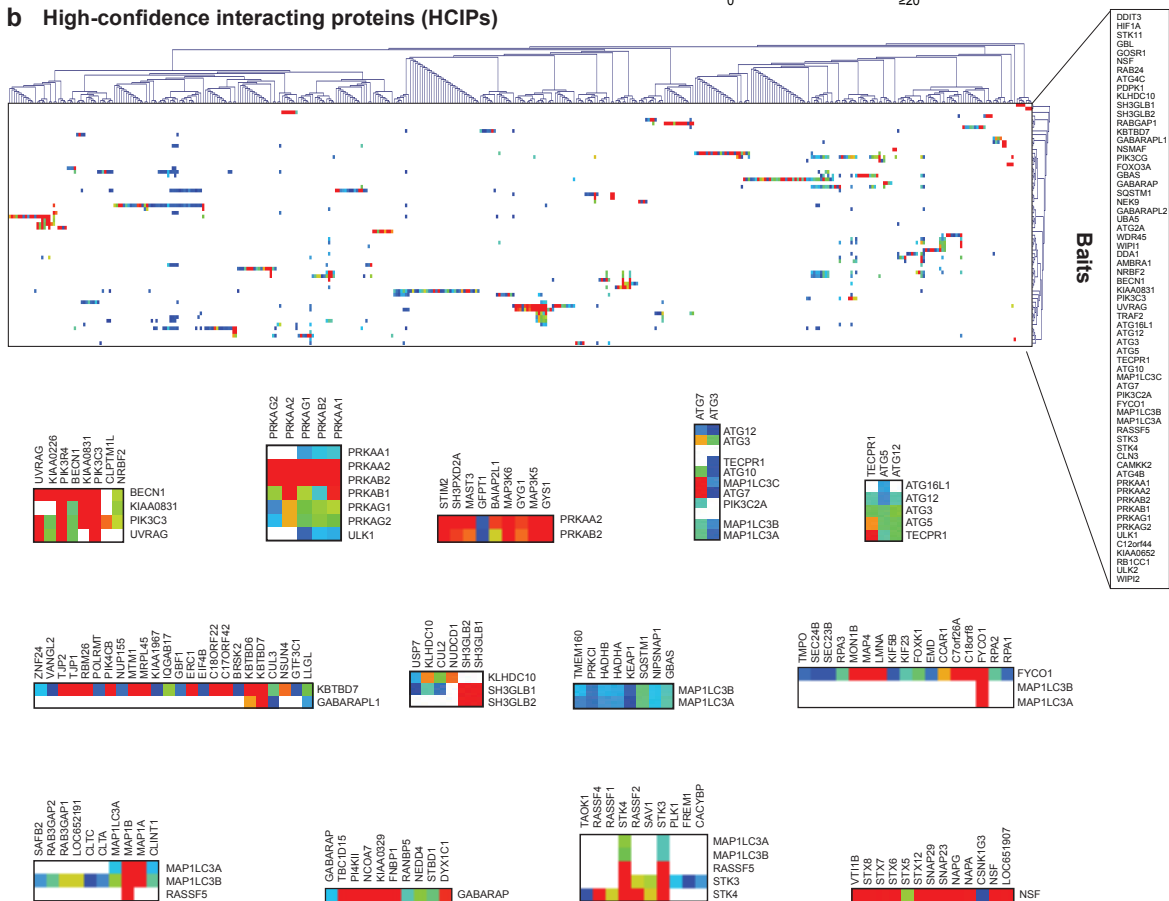

**Figure S3. Global analysis of the autophagy interaction network.** **a**, Heat map generated from hierarchical clustering of the 2553 proteins identified by LC-MS/MS for 65 autophagy network components without filtering via *CompPASS*<sup>1</sup>. The color of the interacting protein in the plot corresponds to its  $WDN$ -score. **b**, Hierarchical clustering of 763 high-confidence interacting proteins after processing via *CompPASS*.

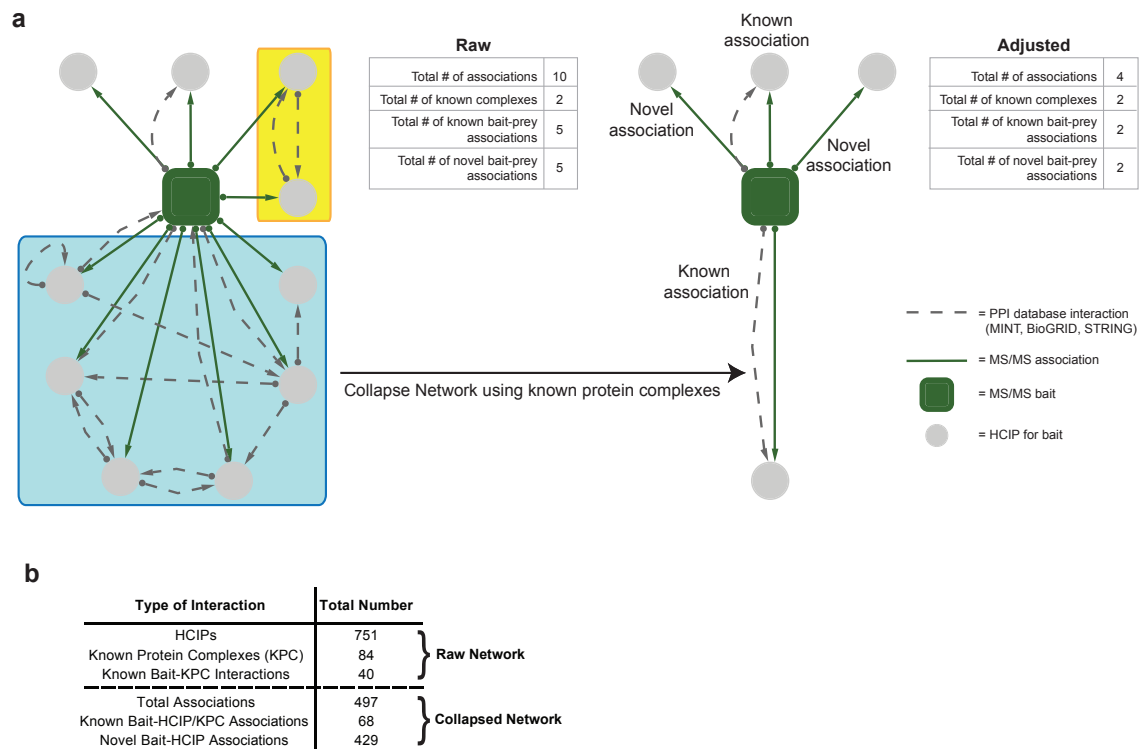

**Figure S4. Development of a module within *CompPASS* to collapse networks using available protein interaction databases and its application to the autophagy interaction network (AIN). a**, Since the nature of the interactions identified in our IP-MS/MS data cannot be determined to be either direct or indirect, we chose to analyze these interactions at a more conservative level by collapsing known multimeric protein complexes (present in BIOGRID, MINT and STRING) into a single representative node. For example, if the 6 proteins known to form a complex are found as HCIPs for a given bait, it cannot be determined to which of these 6 the bait directly interacts. Therefore, rather than reporting 6 interactions for this bait, we report a single interaction to a known protein complex comprised of those 6 interacting proteins. In this manner, we feel that we are not over-representing the number of interactions and can also better report associations with known protein complexes. **b**, Summary of novel and known interactions found using the *Network Collapse* function in *CompPASS* (panel a).

Supplementary Fig. S5

a

Complete AIN Network

| Broad GO Category Process          | AIN HICPs |         | p-value |          |
|------------------------------------|-----------|---------|---------|----------|
|                                    | % found   | % found |         |          |
| DNA Damage                         | 1.99%     | 2.93%   | 0.52%   | 3.57E-02 |
| DNA Replication                    | 0.71%     | 0.91%   | 0.90%   | 4.14E-01 |
| GTPase Signaling                   | 0.90%     | 0.43%   | 0.39%   | 1.14E-01 |
| Ion/A Transport                    | 0.76%     | 1.24%   | 0.59%   | 2.03E-01 |
| Macrosopic Cellular Response       | 4.83%     | 5.63%   | 0.70%   | 1.28E-01 |
| OTHER                              | 5.32%     | 10.24%  | 0.87%   | 6.86E-09 |
| ProteinAA modification             | 2.47%     | 1.08%   | 0.89%   | 5.73E-02 |
| RNA Processing                     | 1.90%     | 8.45%   | 2.83%   | 1.02E-02 |
| apoptosis                          | 4.99%     | 4.55%   | 0.64%   | 2.47E-01 |
| biomethic                          | 8.08%     | 4.09%   | 1.22%   | 4.62E-02 |
| chromatin                          | 1.38%     | 1.71%   | 0.64%   | 2.70E-01 |
| cytoskeleton                       | 1.99%     | 2.37%   | 0.45%   | 2.00E-01 |
| development                        | 7.79%     | 8.41%   | 1.16%   | 2.95E-01 |
| folding                            | 3.13%     | 4.94%   | 1.04%   | 8.77E-02 |
| metabolism & catabolism            | 8.07%     | 7.25%   | 1.83%   | 3.26E-01 |
| mitosis                            | 4.23%     | 5.13%   | 0.59%   | 6.37E-02 |
| morphogenesis                      | 1.86%     | 1.05%   | 0.36%   | 1.25E-02 |
| phosphorylation                    | 5.46%     | 1.83%   | 0.64%   | 5.59E-09 |
| protein localization and transport | 8.02%     | 7.03%   | 0.71%   | 8.11E-02 |
| proteolysis                        | 4.27%     | 1.46%   | 0.59%   | 1.00E-06 |
| signal transduction                | 6.74%     | 4.07%   | 0.64%   | 1.36E-05 |
| transcription                      | 4.84%     | 4.61%   | 1.00%   | 4.09E-01 |
| translation                        | 2.22%     | 7.37%   | 2.37%   | 1.23E-02 |
| ubiquitin                          | 2.71%     | 1.15%   | 1.07%   | 7.41E-02 |
| vesicle transport                  | 7.31%     | 2.94%   | 0.86%   | 3.95E-09 |

significant increase  
significant decrease  
no significant change

ATG8 Sub-Network

| Broad GO Category Process          | ATG8 Network HICPs |         | p-value |          |
|------------------------------------|--------------------|---------|---------|----------|
|                                    | % found            | % found |         |          |
| DNA Damage                         | 0.76%              | 2.93%   | 0.52%   | 3.48E-08 |
| DNA Replication                    | 0.00%              | 0.91%   | 0.90%   | 1.56E-01 |
| GTPase Signaling                   | 2.04%              | 0.43%   | 0.39%   | 2.18E-05 |
| Ion/A Transport                    | 0.76%              | 1.24%   | 0.59%   | 2.05E-01 |
| Macrosopic Cellular Response       | 5.34%              | 5.63%   | 0.70%   | 3.39E-01 |
| OTHER                              | 4.33%              | 10.24%  | 0.87%   | 4.49E-12 |
| ProteinAA modification             | 4.33%              | 1.08%   | 0.89%   | 1.28E-04 |
| RNA Processing                     | 0.29%              | 8.45%   | 2.83%   | 1.87E-03 |
| apoptosis                          | 5.89%              | 4.55%   | 0.64%   | 2.08E-02 |
| biomethic                          | 5.80%              | 4.09%   | 1.22%   | 1.02E-01 |
| chromatin                          | 0.00%              | 1.71%   | 0.64%   | 7.66E-04 |
| cytoskeleton                       | 2.54%              | 2.37%   | 0.45%   | 3.49E-01 |
| development                        | 6.97%              | 8.41%   | 1.16%   | 9.19E-02 |
| folding                            | 0.51%              | 4.94%   | 1.04%   | 6.09E-08 |
| metabolism & catabolism            | 6.87%              | 7.25%   | 1.83%   | 4.18E-01 |
| mitosis                            | 1.78%              | 5.13%   | 0.59%   | 7.39E-09 |
| morphogenesis                      | 1.79%              | 1.05%   | 0.36%   | 2.05E-02 |
| phosphorylation                    | 4.83%              | 1.83%   | 0.64%   | 1.14E-08 |
| protein localization and transport | 11.45%             | 7.03%   | 0.71%   | 2.96E-10 |
| proteolysis                        | 6.11%              | 1.46%   | 0.59%   | 2.72E-15 |
| signal transduction                | 6.87%              | 4.07%   | 0.64%   | 5.50E-08 |
| transcription                      | 4.58%              | 4.61%   | 1.00%   | 4.87E-01 |
| translation                        | 0.00%              | 7.37%   | 2.37%   | 7.15E-04 |
| ubiquitin                          | 4.83%              | 1.15%   | 1.07%   | 3.03E-04 |
| vesicle transport                  | 11.70%             | 2.94%   | 0.86%   | 0.00E+00 |

significant increase  
significant decrease  
no significant change

AIN Network Background Proteins\*

| Broad GO process Category          | Background Proteins |         | p-value |          |
|------------------------------------|---------------------|---------|---------|----------|
|                                    | % found             | % found |         |          |
| DNA Damage                         | 2.95%               | 1.07%   | 0.57%   | 1.21E-02 |
| DNA Replication                    | 0.86%               | 0.38%   | 0.13%   | 1.08E-04 |
| GTPase Signaling                   | 0.43%               | 2.33%   | 0.79%   | 8.17E-03 |
| Ion/A Transport                    | 1.22%               | 2.54%   | 0.88%   | 6.33E-03 |
| Macrosopic Cellular Response       | 5.63%               | 6.78%   | 2.31%   | 3.09E-01 |
| OTHER                              | 10.32%              | 27.40%  | 9.32%   | 3.34E-02 |
| ProteinAA modification             | 1.04%               | 0.79%   | 0.27%   | 1.59E-01 |
| RNA Processing                     | 8.62%               | 2.00%   | 0.68%   | 0.00E+00 |
| apoptosis                          | 4.59%               | 2.71%   | 0.92%   | 2.05E-02 |
| biomethic                          | 4.07%               | 2.24%   | 0.76%   | 1.01E-02 |
| chromatin                          | 1.72%               | 0.83%   | 0.28%   | 7.98E-04 |
| cytoskeleton                       | 2.39%               | 1.06%   | 0.36%   | 1.11E-04 |
| development                        | 8.39%               | 12.03%  | 4.09%   | 1.99E-01 |
| folding                            | 4.61%               | 0.77%   | 0.26%   | 0.00E+00 |
| metabolism & catabolism            | 7.21%               | 5.99%   | 2.04%   | 2.75E-01 |
| mitosis                            | 5.16%               | 4.39%   | 1.49%   | 3.04E-01 |
| morphogenesis                      | 1.03%               | 1.38%   | 0.47%   | 2.36E-01 |
| phosphorylation                    | 1.80%               | 2.26%   | 0.77%   | 2.73E-01 |
| protein localization and transport | 6.99%               | 2.90%   | 0.99%   | 1.71E-08 |
| proteolysis                        | 1.41%               | 1.85%   | 0.65%   | 3.38E-01 |
| signal transduction                | 3.97%               | 7.00%   | 2.38%   | 1.02E-01 |
| transcription                      | 4.64%               | 6.52%   | 2.22%   | 1.98E-01 |
| translation                        | 2.68%               | 0.80%   | 0.27%   | 0.00E+00 |
| ubiquitin                          | 1.12%               | 1.03%   | 0.35%   | 3.94E-01 |
| vesicle transport                  | 2.22%               | 2.57%   | 0.87%   | 3.44E-01 |

\*background proteins have a WD<sup>ns</sup> < 1 and a TSC p-value > 3E-5

b

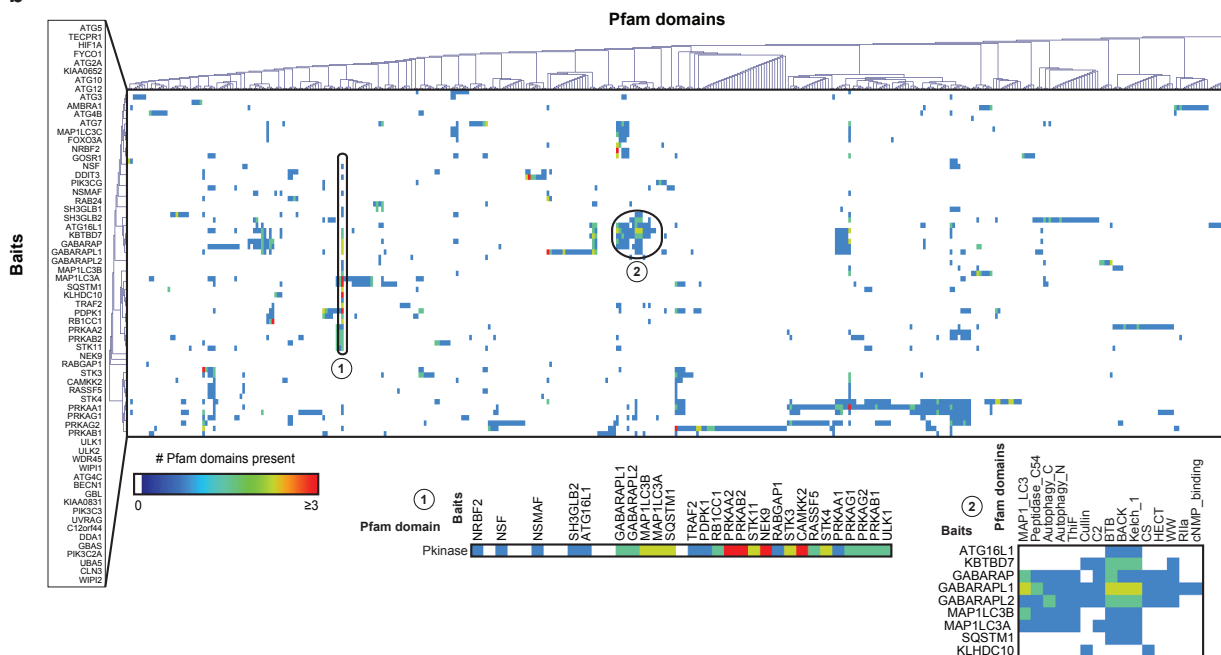

c

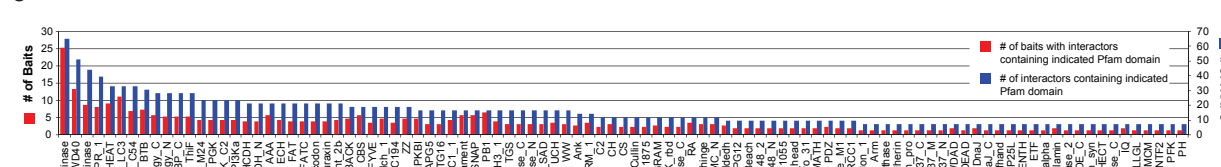

## Supplementary Fig. S5d

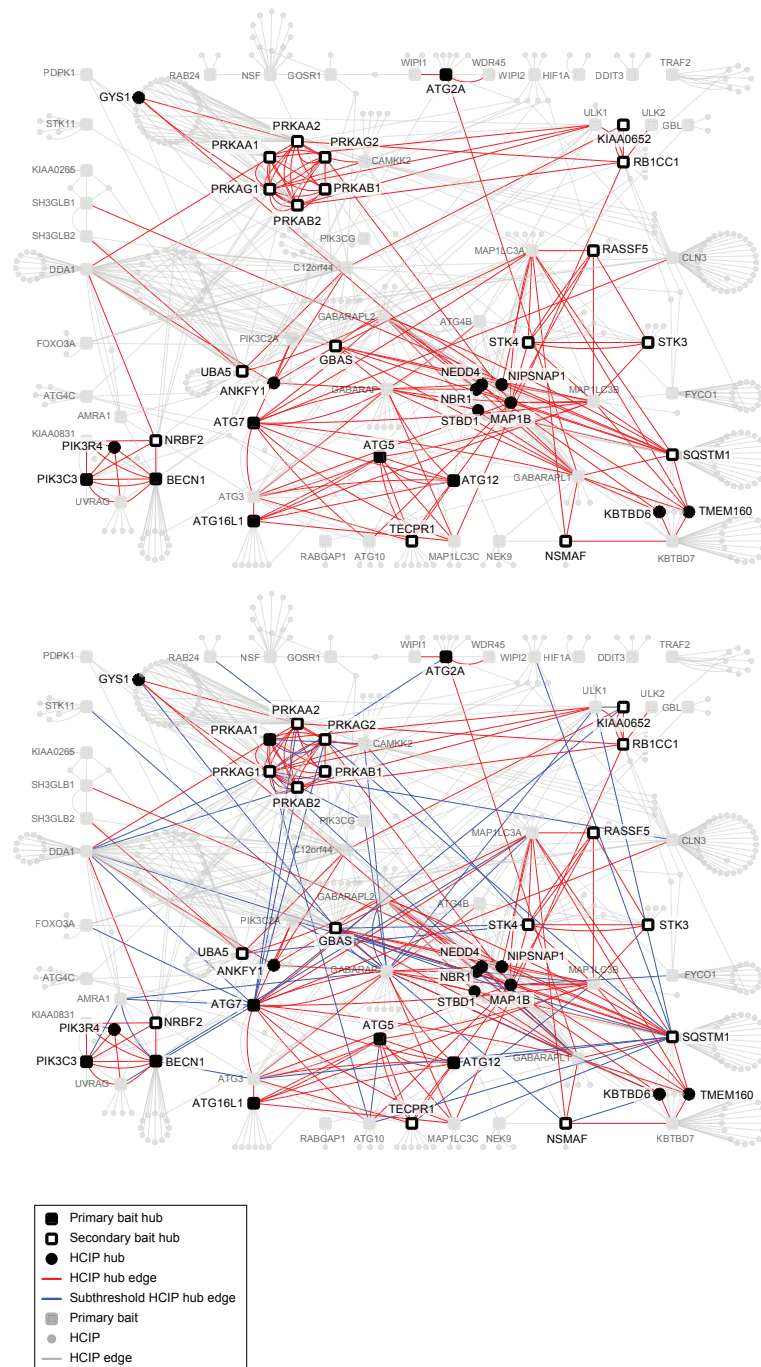

**Figure S5. Functional and structural analysis of the autophagy interaction network.** **a**, Enrichment of Gene Ontology (GO) process descriptors for HCIPs ( $WD^N$ -score  $\geq 1.0$ ,  $p < 10^{-5}$ ) in the autophagy interaction network (AIN, left panel), the ATG8 sub-network (center panel), and proteins with  $WD^N$ -scores  $\geq 1.0$  (right panel). Enrichments were determined as described in the Supplemental Methods section. **b**, Hierarchical clustering of proteins found associated with 65 bait proteins, with the number of PFAM domains present indicated by the heat map. **c**, Distribution of PFAM domains found among baits (red bars) and HCIPs (blue bars). **d**, Analysis of hubs in the AIN. Hubs were identified based on their presence as HCIPs in IP-MS/MS experiments from 3 different baits with  $WD^N$ -Score  $\geq 3$  each and an average  $WD^N$ -Score  $\geq 2$  across all IP-MS/MS experiments in which a hub candidate was present based on TSCs. Primary and secondary bait refers to the classification in Fig 1.

## Supplementary Fig. S6

a

|                        | Bait    | HCIPs | Total known PPIs for bait (MINT/BioGRID) | # of known PPIs identified in this study by LC-MS/MS | Novel PPIs | Reciprocal PPIs           |                          |
|------------------------|---------|-------|------------------------------------------|------------------------------------------------------|------------|---------------------------|--------------------------|
|                        |         |       |                                          |                                                      |            | Potential reciprocal PPIs | Observed reciprocal PPIs |
| UBL conjugation system | ATG3    | 15    | 3                                        | 3                                                    | 12         | 10                        | 7                        |
|                        | ATG4B   | 6     | 4                                        | 3                                                    | 3          | 7                         | 4                        |
|                        | ATG5    | 7     | 2                                        | 1                                                    | 6          | 5                         | 4                        |
|                        | ATG7    | 6     | 1                                        | 1                                                    | 5          | 8                         | 6                        |
|                        | ATG10   | 18    | 1                                        | 0                                                    | 18         | 7                         | 0                        |
|                        | ATG12   | 11    | 14                                       | 3                                                    | 8          | 6                         | 3                        |
|                        | ATG16L1 | 8     | 2                                        | 1                                                    | 7          | 6                         | 1                        |
|                        | TECPR1  | 12    |                                          |                                                      | 12         | 3                         | 3                        |
|                        | Total   | 83    | 27                                       | 12                                                   | 71         | 52                        | 28                       |

b

| Bait   | Interactor | Method   | Reference        |
|--------|------------|----------|------------------|
| ATG16L | IKBK       | HT-AC-MS | Bouwmeester 2004 |
| ATG16L | ATG12      | HT-AC-MS | Ewing 2008       |
| ATG12  | SF3A1      | HT-AC-MS | Ewing 2008       |
| ATG12  | AUP1       | HT-AC-MS | Ewing 2008       |
| ATG12  | ATG16L     | HT-AC-MS | Ewing 2008       |
| ATG12  | SF3B1      | HT-AC-MS | Ewing 2008       |
| ATG12  | ATG3       | AC-W     | Tanida 2002      |
| ATG12  | ATG10      | HT-AC-MS | Ewing 2008       |
| ATG12  | ATG5       | HT-AC-MS | Ewing 2008       |
| ATG12  | PTK2       | Y2H      | Rual 2005        |
| ATG12  | KRTAP4-12  | Y2H      | Rual 2005        |
| ATG12  | MDF1       | Y2H      | Rual 2005        |
| ATG12  | DHX36      | HT-AC-MS | Ewing 2008       |
| ATG12  | OTUD4      | HT-AC-MS | Ewing 2008       |
| ATG12  | PLSCR1     | Y2H      | Rual 2005        |
| ATG3   | ATG12      | AC-W     | Tanida 2002      |
| ATG3   | ATG7       | AC-W     | Tanida 2002      |
| ATG3   | GABARAPL2  | HT-AC-MS | Ewing 2008       |
| ATG7   | atg3       | AC-W     | Tanida 2002      |
| ATG10  | ATG12      | HT-AC-MS | Ewing 2008       |
| ATG5   | ATG12      | HT-AC-MS | Ewing 2008       |
| ATG5   | IMPDH2     | HT-AC-MS | Ewing 2008       |
| ATG4B  | GABARAPL2  | HT-AC-MS | Ewing 2008       |
| ATG4B  | fbxw11     | HT-AC-MS | Sowa 2009        |
| ATG4B  | GABARAP    | Y2H      | Steizl 2005      |
| ATG4B  | MAP1LC3B   | Y2H      | Steizl 2005      |
| ATG4B  | C14orf139  | Y2H      | Steizl 2005      |

AC-W: affinity capture-western

Y2H: yeast 2 hybrid

HT-AC-MS: High-throughput affinity capture mass spec

c

| Network                | Potential reciprocal PPIs | Observed reciprocal PPIs |
|------------------------|---------------------------|--------------------------|
| UBL conjugation system | 44                        | 21                       |
| ULK1 kinase            | 35                        | 17                       |
| PIK3C3-BECN1           | 11                        | 7                        |
| SH3GLB1                | 2                         | 1                        |
| ATG2-WIPI              | 2                         | 1                        |
| Total                  | 94                        | 47                       |

Supplementary Fig. S6d

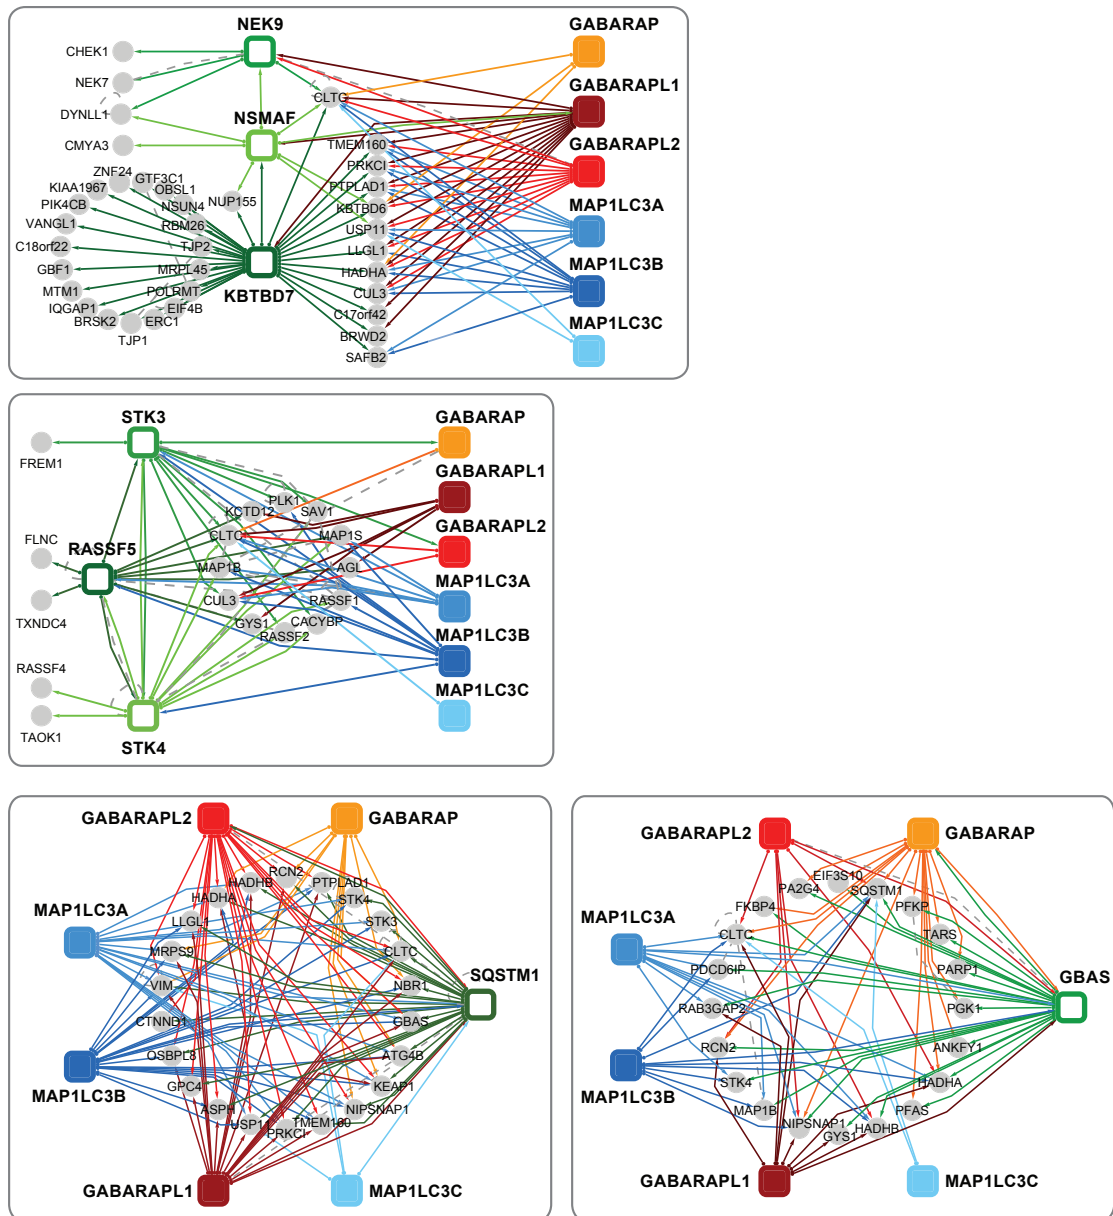



Supplementary Fig. S6e (Part 1)

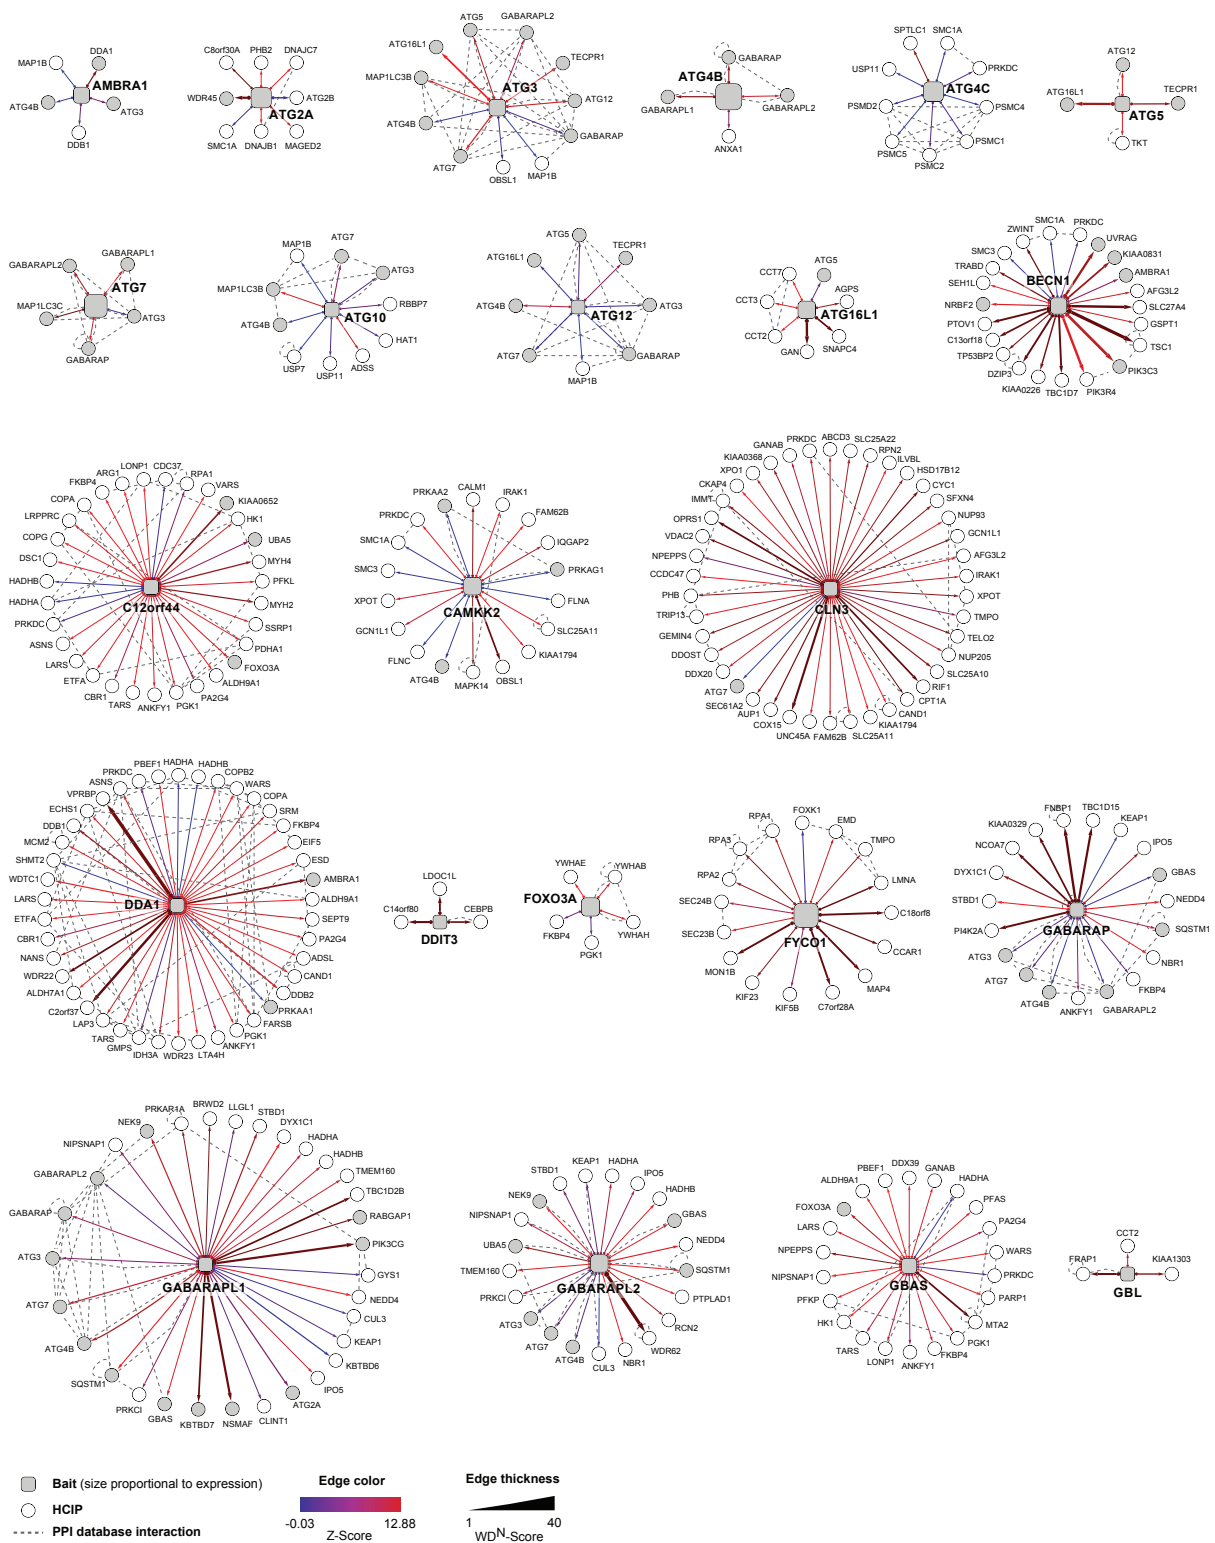



Supplementary Fig. S6e (Part 2)

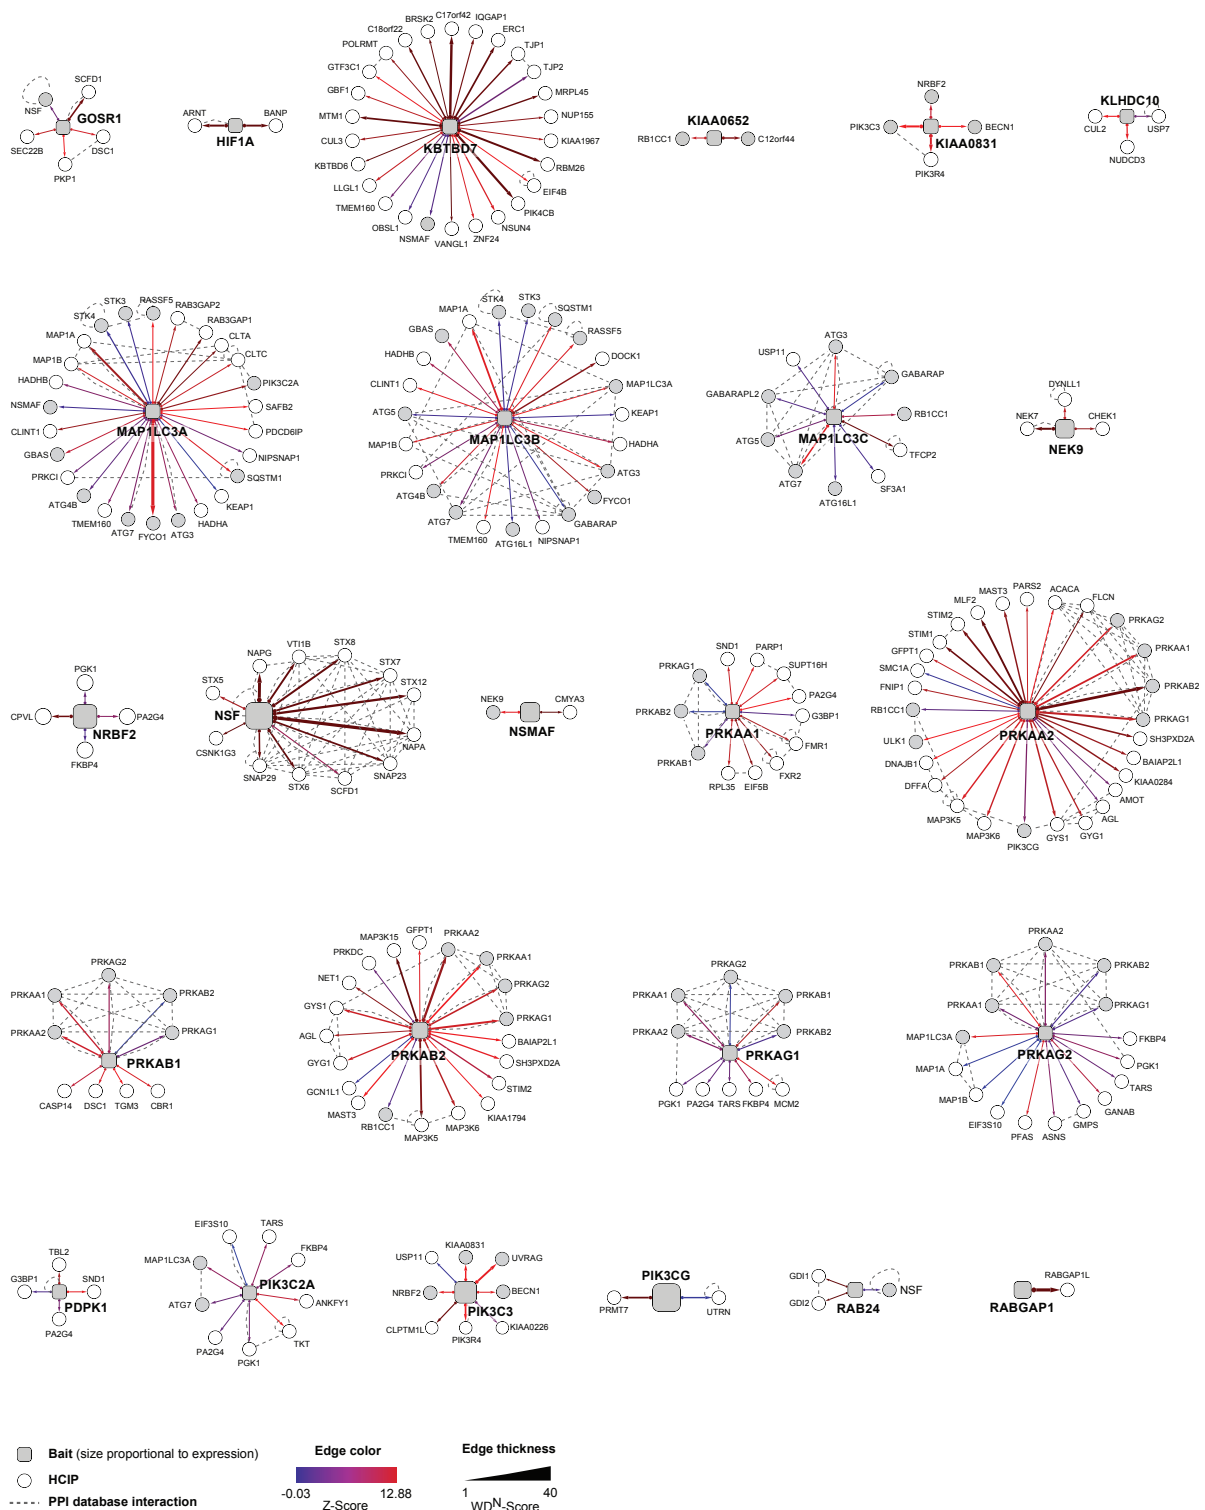

## Supplementary Fig. S6e (part 3)

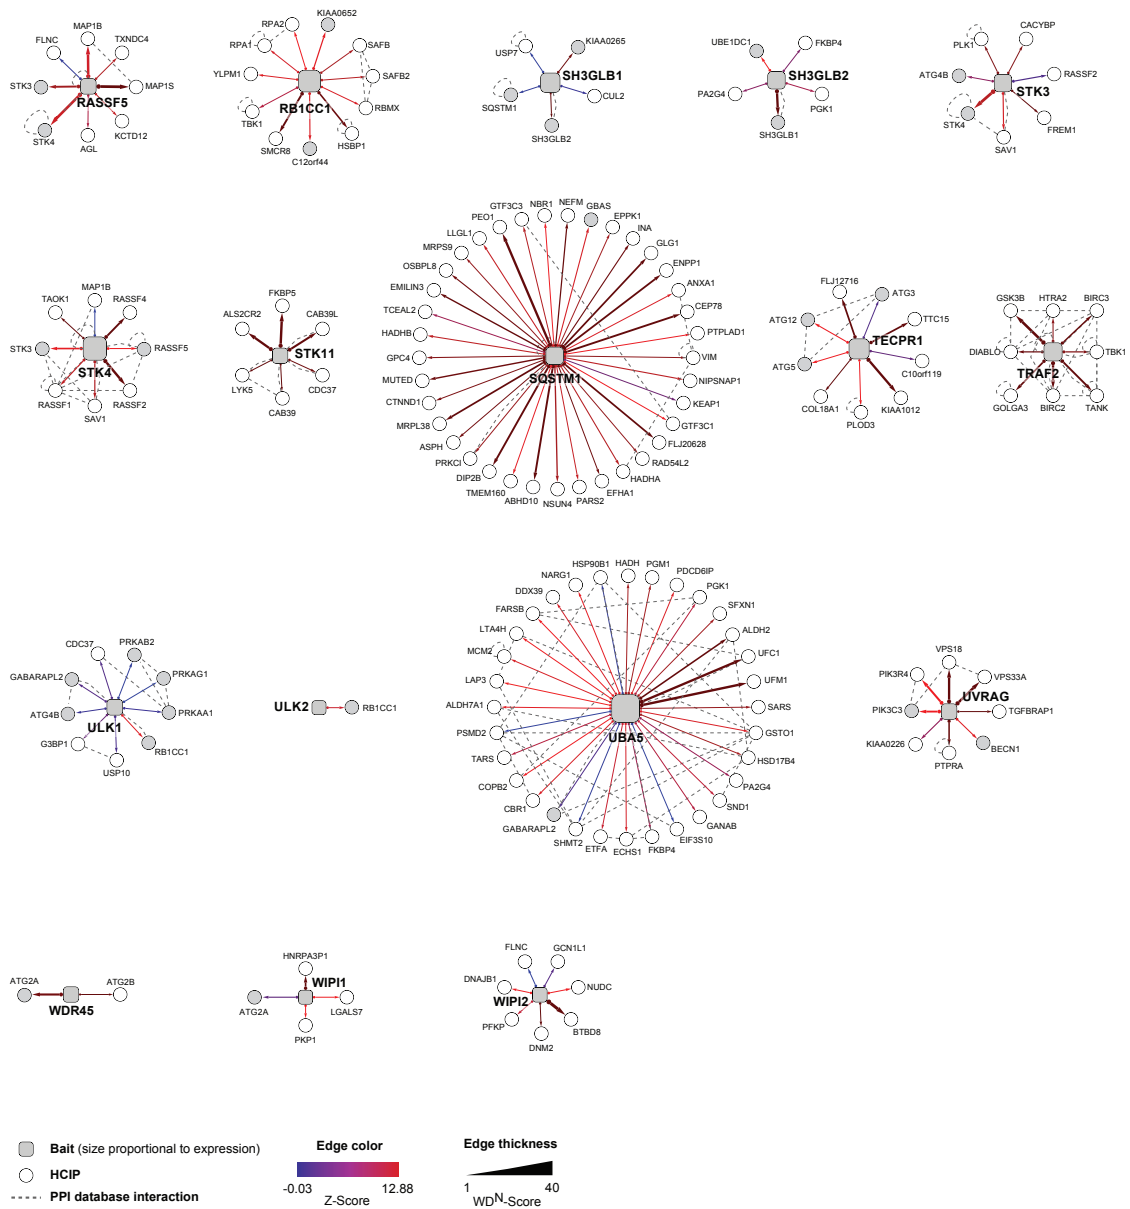

## Supplementary Fig. S6f

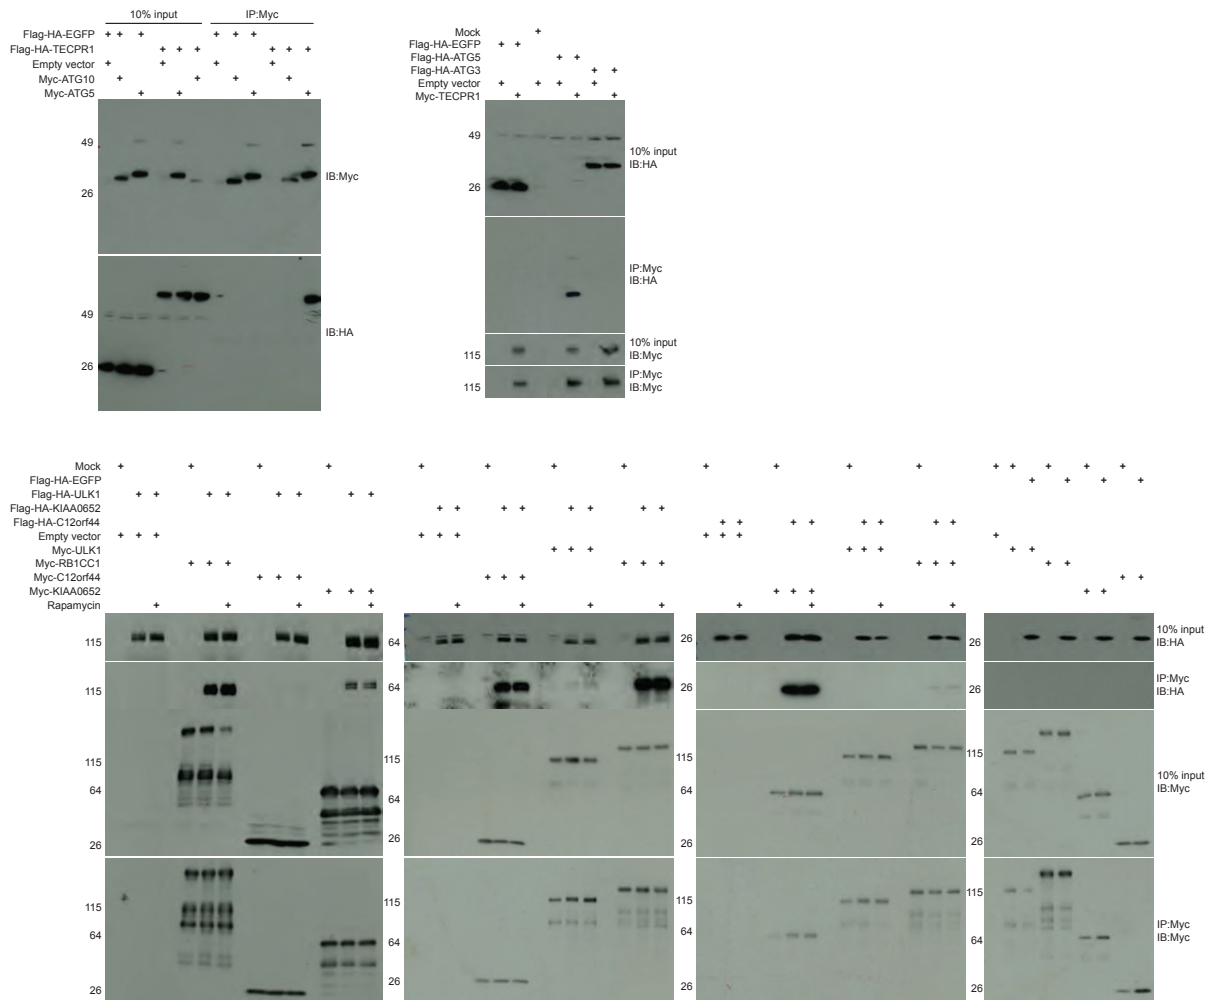

## Supplementary Fig. S6g

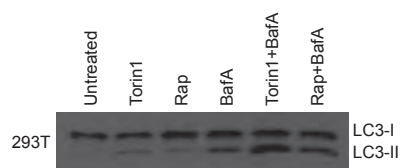

**Figure S6. Summary of reciprocal interactions for the AIN and analysis of previously reported interactions for the UBL conjugation system.** **a**, Summary of the LC-MS/MS data for the UBL conjugation system showing the number of HCIPs, number of known interacting proteins in BIOGRID and MINT, and the number of reciprocal interactions observed. **b**, Summary of previously reported interaction for the UBL conjugation system. **c**, Summary of reciprocal interactions in the networks presented in Fig. 2 and Fig. 3 determined by LC-MS/MS. **d**, Merged interaction maps of HCIPs found in  $\geq 2$  IP-MS/MS experiments among indicated baits. Common interacting proteins with sub-threshold  $WD^N$ -scores were included if HCIP criteria were fulfilled in  $\geq 1$  IP-MS/MS experiment. **e**, Individual interaction maps showing all the HCIPs identified for primary and secondary baits examined in this study. Dotted lines indicate interactions found in BIOGRID, MINT, and STRING protein interaction databases. **f**, IP-Western validation. Myc-tagged interactors indicated were transfected into 293T cells with stable expression of indicated Flag-HA-bait or Flag-HA-GFP. Lysates were immunoprecipitated with anti-myc resin and immunoblotted with either HA or anti-MYC antibodies. **g**,  $\alpha$ -LC3 blot of 293T cells in the absence and present of Torin1 (200 nM, 3h), Rapamycin (200nM, 3h) and Bafilomycin (100 nM, 3h).

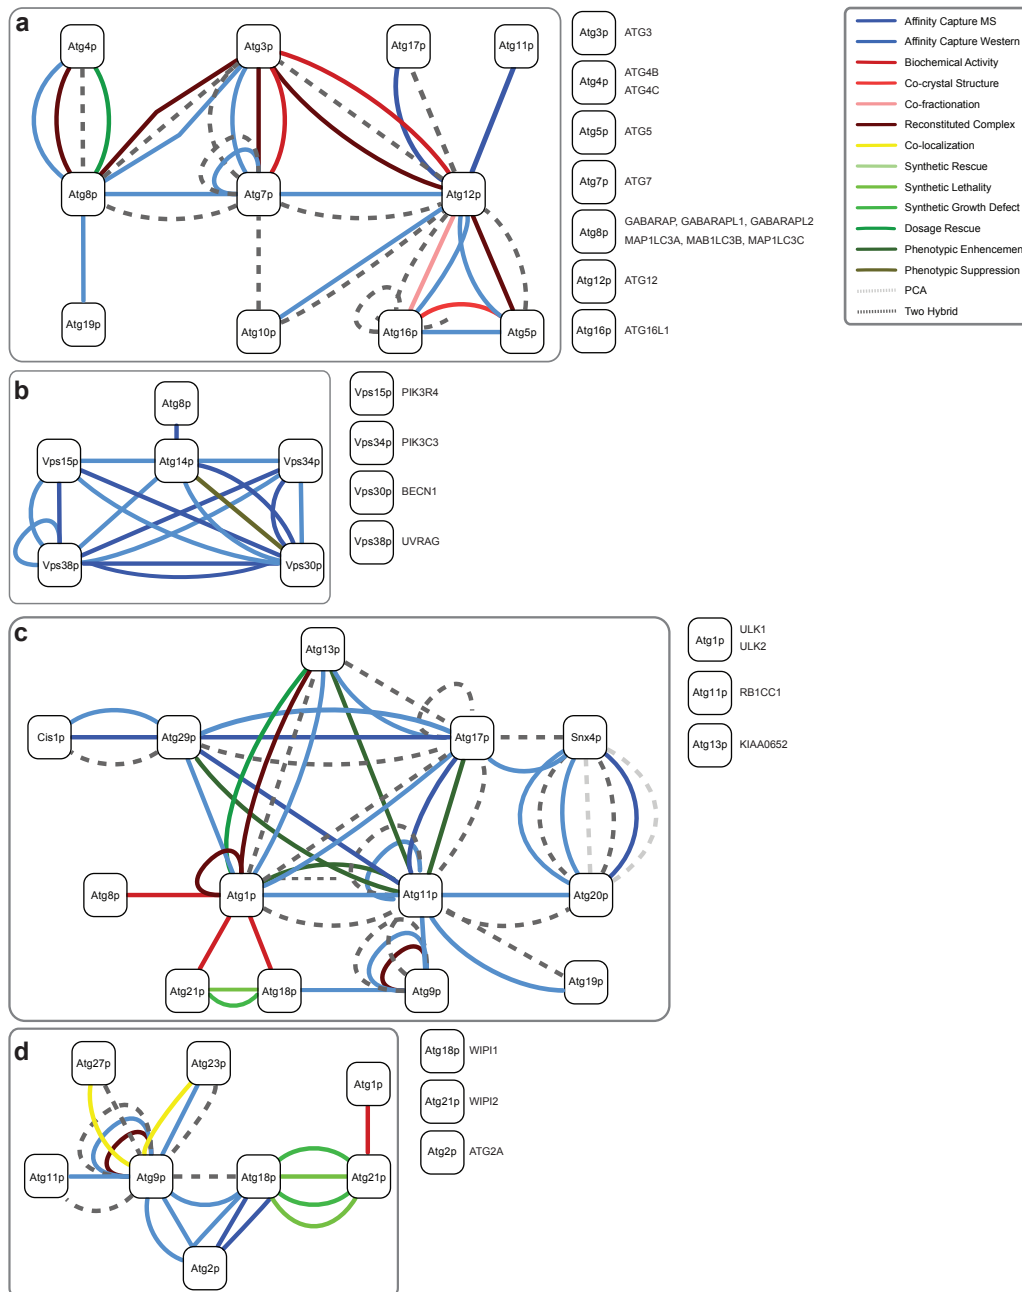

**Figure S7. Summary of core interactions in the budding yeast autophagy system.** All network data is based on BIOGRID and MINT databases. **a**, UBL conjugation system. **b**, Vps34p lipid kinase network. **c**, Atg1p protein kinase network. **d**, Atg2p membrane trafficking network. The corresponding human proteins are identified on the right of each panel. The color code indicates the type of interaction data.

**a**

|              | Bait      | HCIPs | Total known PPIs for bait (MINT/BioGRID) | # of known PPIs identified in this study by LC-MS/MS | Novel PPIs | Reciprocal PPIs           |                          | HCIPs found in biological replicate |
|--------------|-----------|-------|------------------------------------------|------------------------------------------------------|------------|---------------------------|--------------------------|-------------------------------------|
|              |           |       |                                          |                                                      |            | Potential reciprocal PPIs | Observed reciprocal PPIs |                                     |
| Human ATG8's | GABARAPL1 | 40    | 3                                        | 1                                                    | 39         | 10                        | 4                        | 26                                  |
|              | GABARAPL2 | 31    | 22                                       | 5                                                    | 26         | 10                        | 7                        | 26                                  |
|              | GABARAP   | 27    | 13                                       | 1                                                    | 26         | 12                        | 6                        | 19                                  |
|              | MAP1LC3A  | 35    | 7                                        | 2                                                    | 33         | 11                        | 4                        | 22                                  |
|              | MAP1LC3B  | 34    | 3                                        | 1                                                    | 33         | 13                        | 4                        | 29                                  |
|              | MAP1LC3C  | 15    |                                          |                                                      | 15         | 9                         | 1                        | 13                                  |
|              | Total     | 162   | 48                                       | 10                                                   | 172        | 65                        | 26                       | 135                                 |

**b**

| Pfam domain          | Gene Symbol |          |           |          |          |          |
|----------------------|-------------|----------|-----------|----------|----------|----------|
|                      | BRWD2       | NSMAF    | WDR62     | PK3R4    | LLGL1    | ATG16L1  |
| MAP1_LC3             | GABARAP     | GABARAP1 | GABARAPL2 | MAB1LC3B | MAB1LC3C | MAP1LC3A |
| Kinase               | NEK9        | STK4     | STK3      | FRKCI    | PK3R4    |          |
| BTB                  | ANKFY1      | KBTD6    | KBTD7     | KEAP1    |          |          |
| PB_P4_kinase         | PK3CG       | PK3C3    | PK3C2A    | PKK2A    |          |          |
| BACK                 | KBTD6       | KBTD7    | KEAP1     |          |          |          |
| Kelch_1              | KBTD6       | KBTD7    | KEAP1     |          |          |          |
| FB1                  | SOSTM1      | NBR1     | FRKCI     |          |          |          |
| PKK_C2               | PK3CG       | PK3C3    | PK3C2A    |          |          |          |
| PKKa                 | PK3CG       | PK3C3    | PK3C2A    |          |          |          |
| TBC                  | TBC1D15     | TBC1D2B  | RABGAP1   |          |          |          |
| NFSAAP               | NFSAAP1     | GBAS     |           |          |          |          |
| ZZ                   | SOSTM1      | NBR1     |           |          |          |          |
| C1_1                 | RASSF5      | FRKCI    |           |          |          |          |
| EGH                  | HADHA       |          |           |          |          |          |
| FYVE                 | ANKFY1      | FYCO1    |           |          |          |          |
| CS                   | DYX1C1      | PTPLAD1  |           |          |          |          |
| PKK_rbd              | PK3CG       | PK3C2A   |           |          |          |          |
| SH3_1                | DOCK1       | FNBP1    |           |          |          |          |
| TPR_1                | DYX1C1      | FKBP4    |           |          |          |          |
| Met1_SARAH           | STK4        | STK3     |           |          |          |          |
| HEAT                 | RANBP5      | PK3R4    |           |          |          |          |
| Peptidase_C54        | ATG4B       |          |           |          |          |          |
| 3HCDH                | HADHA       |          |           |          |          |          |
| 3HCDH_N              | HADHA       |          |           |          |          |          |
| C2                   | PK3C2A      |          |           |          |          |          |
| Kinase_C             | FRKCI       |          |           |          |          |          |
| Thiolase_C           | HADHB       |          |           |          |          |          |
| Thiolase_N           | HADHB       |          |           |          |          |          |
| ENTH                 | CLINT1      |          |           |          |          |          |
| GRAM                 | NSMAF       |          |           |          |          |          |
| HECT                 | NEDD4       |          |           |          |          |          |
| WW                   | NEDD4       |          |           |          |          |          |
| Beach                | NSMAF       |          |           |          |          |          |
| Quilin               | CUL3        |          |           |          |          |          |
| MAP1B_neuraxin       | MAP1B       |          |           |          |          |          |
| RA                   | RASSF5      |          |           |          |          |          |
| RCC1                 | NEK9        |          |           |          |          |          |
| UBA                  | SOSTM1      |          |           |          |          |          |
| Ank                  | ANKFY1      |          |           |          |          |          |
| BRO1                 | RCC8BP      |          |           |          |          |          |
| Cathrin              | CLTC        |          |           |          |          |          |
| Cathrin_lg_ch        | CLTA        |          |           |          |          |          |
| Cathrin_propel       | CLTC        |          |           |          |          |          |
| Cathrin-link         | CLTC        |          |           |          |          |          |
| cNMP_binding         | FRKAR1A     |          |           |          |          |          |
| CP2                  | TFCP2       |          |           |          |          |          |
| FOH                  | FNBP1       |          |           |          |          |          |
| FKBP_C               | FKBP4       |          |           |          |          |          |
| Glycogen_syn         | GSY1        |          |           |          |          |          |
| Hyd_WA               | KIAA0329    |          |           |          |          |          |
| LLGL                 | LLGL1       |          |           |          |          |          |
| LysM                 | NCOA7       |          |           |          |          |          |
| PK                   | PK3C2A      |          |           |          |          |          |
| Rba                  | FRKAR1A     |          |           |          |          |          |
| RRM_1                | SAFB2       |          |           |          |          |          |
| SAP                  | SAFB2       |          |           |          |          |          |
| Surp                 | SF3A1       |          |           |          |          |          |
| TLD                  | NCOA7       |          |           |          |          |          |
| ubiquitin            | SF3A1       |          |           |          |          |          |
| UCH                  | USP11       |          |           |          |          |          |
| Ded_cyto             | DOCK1       |          |           |          |          |          |
| PTPLA                | PTPLAD1     |          |           |          |          |          |
| CSM_20               | STBD1       |          |           |          |          |          |
| RUN domain           | FYCO1       |          |           |          |          |          |
| DUF354               | TBC1D15     |          |           |          |          |          |
| DUSP                 | USP11       |          |           |          |          |          |
| ThF                  | UBE1DC1     |          |           |          |          |          |
| PRP21_like_P         | SF3A1       |          |           |          |          |          |
| ATG_C                | ATG2A       |          |           |          |          |          |
| Autophagy_N          | ATG3        |          |           |          |          |          |
| Autophagy_act_C      | ATG3        |          |           |          |          |          |
| Autophagy_Oterm      | ATG3        |          |           |          |          |          |
| ATG11                | RB1CC1      |          |           |          |          |          |
| DUF3694              | RABGAP1     |          |           |          |          |          |
| PD                   | RABGAP1     |          |           |          |          |          |
| Quilin_Nedd8         | CUL3        |          |           |          |          |          |
| APG5                 | ATG5        |          |           |          |          |          |
| ThF                  | ATG7        |          |           |          |          |          |
| ATG16                | ATG16L1     |          |           |          |          |          |
| FH                   | TBC1D2B     |          |           |          |          |          |
| No Domain annotation | TMEM160     | MAP1A    | RCN2      | RAB3GAP2 | RAB3GAP1 |          |

**Figure S8. Summary of LC-MS/MS data and comparison to existing protein interaction data for the core autophagy signaling systems, as well as for the ATG8 sub-network. a,** The bait, number of HCIPs, number of novel interactions found, ratio of known and total interactions found, and the results of reciprocal LC-MS/MS of selected interacting proteins is shown for the ATG8 network. **b,** PFAM analysis of the ATG8 sub-network. Proteins containing the indicated PFAM protein interaction domains are shown.

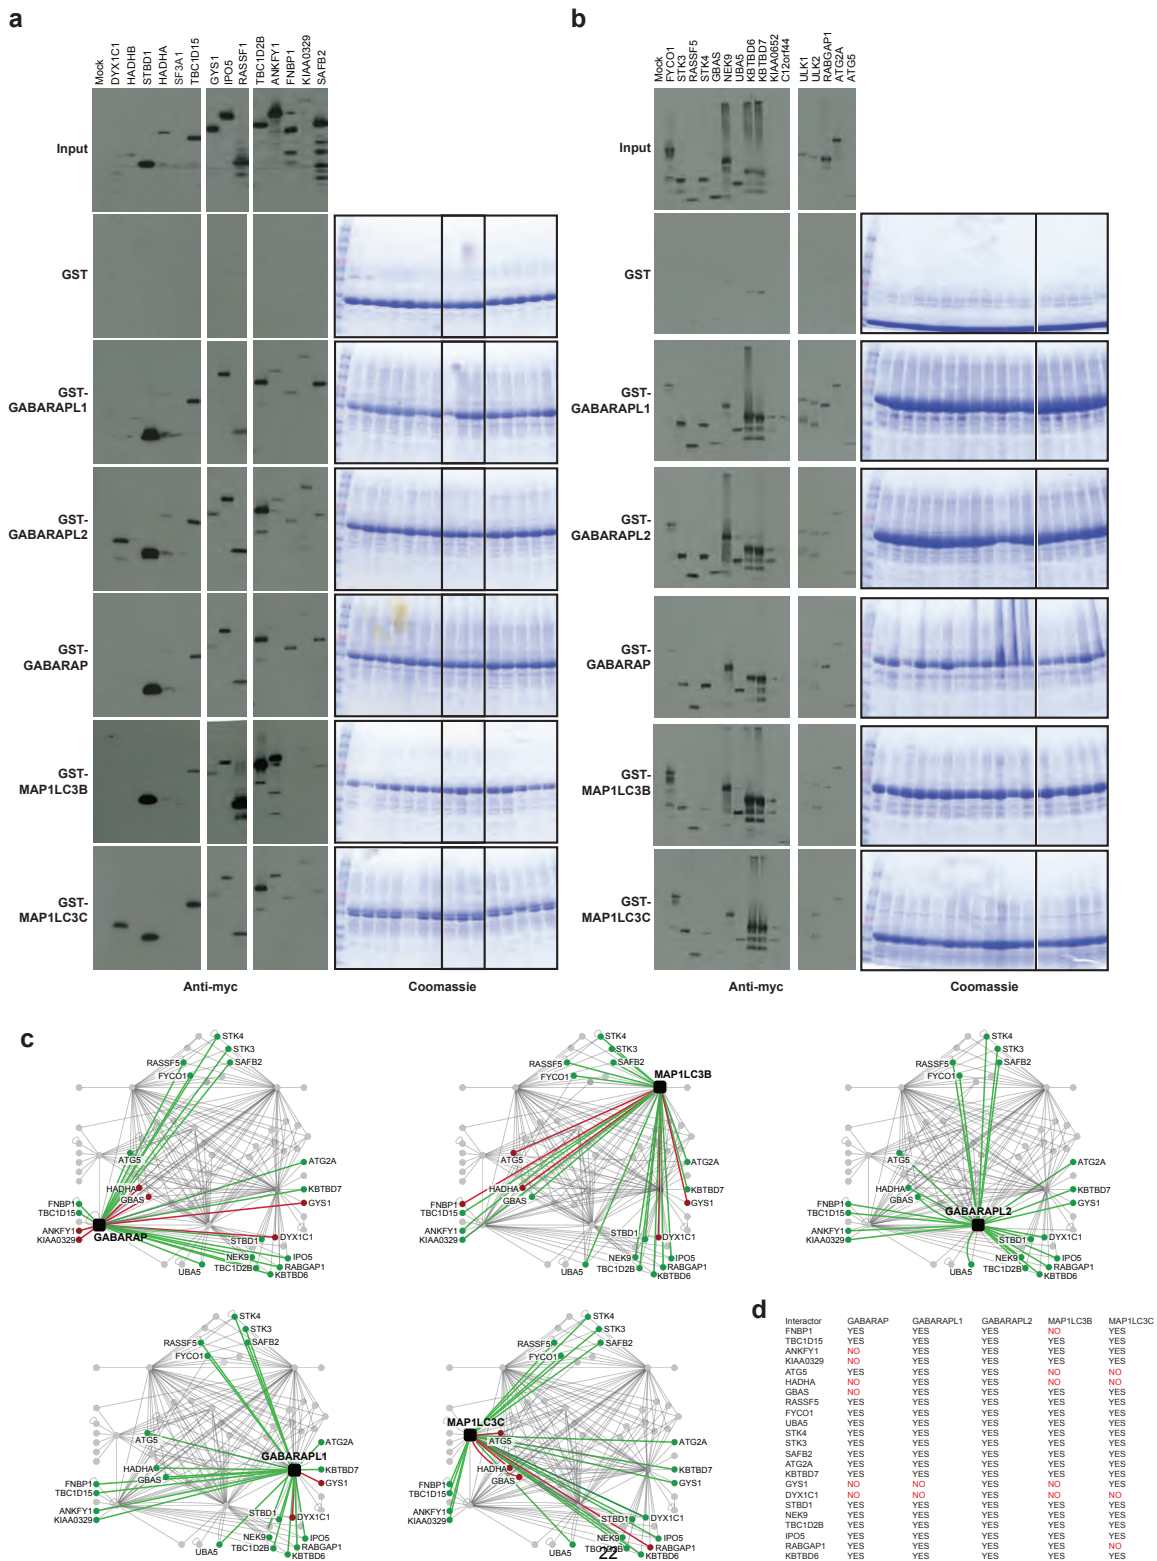

**Figure S9. Association of GST-ATG8 proteins with MYC-tagged interacting proteins.** **a-b**, Vectors expressing the indicated MYC-tagged HCIPs for the ATG8 network were transfected into 293T cells and subsequently tested for interaction with GST-ATG8 resin, associated proteins were detected by immunoblotting with anti-MYC antibodies. **c**, *Ex vivo* validation. MYC-tagged proteins in extracts from 293T cells were tested for GST-ATG8 binding *in vitro* (Panel a). Green: binding. Red: no binding observed. Extracts from 293T cells transiently expressing the indicated Mys-tagged ATG8 interacting protein were lysed and extracts subjected to *in vitro* binding with the indicated GST-ATG8 isoform purified from bacteria. Washed complexes were subjected to SDS-PAGE, and immunoblotted using anti-MYC antibodies. **d**, Summary of binding data.



## Supplementary Fig. S10

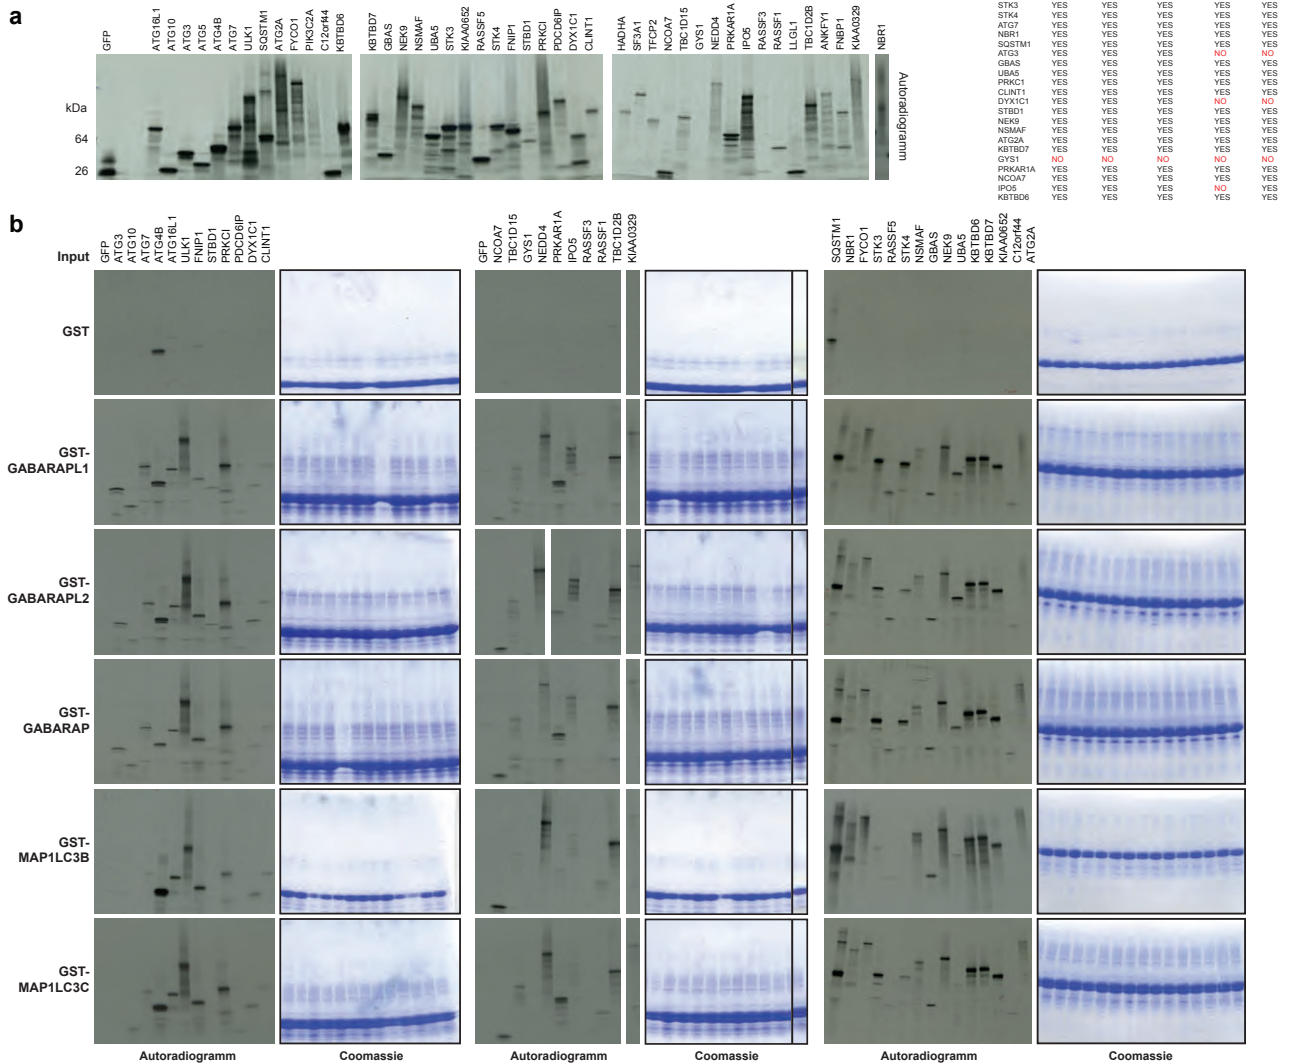

**Figure S10. Association of GST-ATG8 proteins with *in vitro* translated interacting proteins.** **a**, The indicated HCIPs for ATGs were translated and  $^{35}\text{S}$ -methionine-labelled *in vitro* using reticulocyte extracts. **b**, Five  $\mu\text{l}$  of translation product was incubated in 150  $\mu\text{l}$  of binding buffer containing 2  $\mu\text{g}$  of the indicated GST-ATG8 protein bound to 10  $\mu\text{l}$  of GSH-Sepharose beads. After incubation for 1 hour, beads were washed 5 times with 1 ml of binding buffer. Associated proteins were separated by SDS-PAGE, stained with Coomassie, and subjected to autoradiography. **c**, Summary table indicating the proteins that interact with each ATG8 ortholog *in vitro*.

Supplementary Fig. S11a

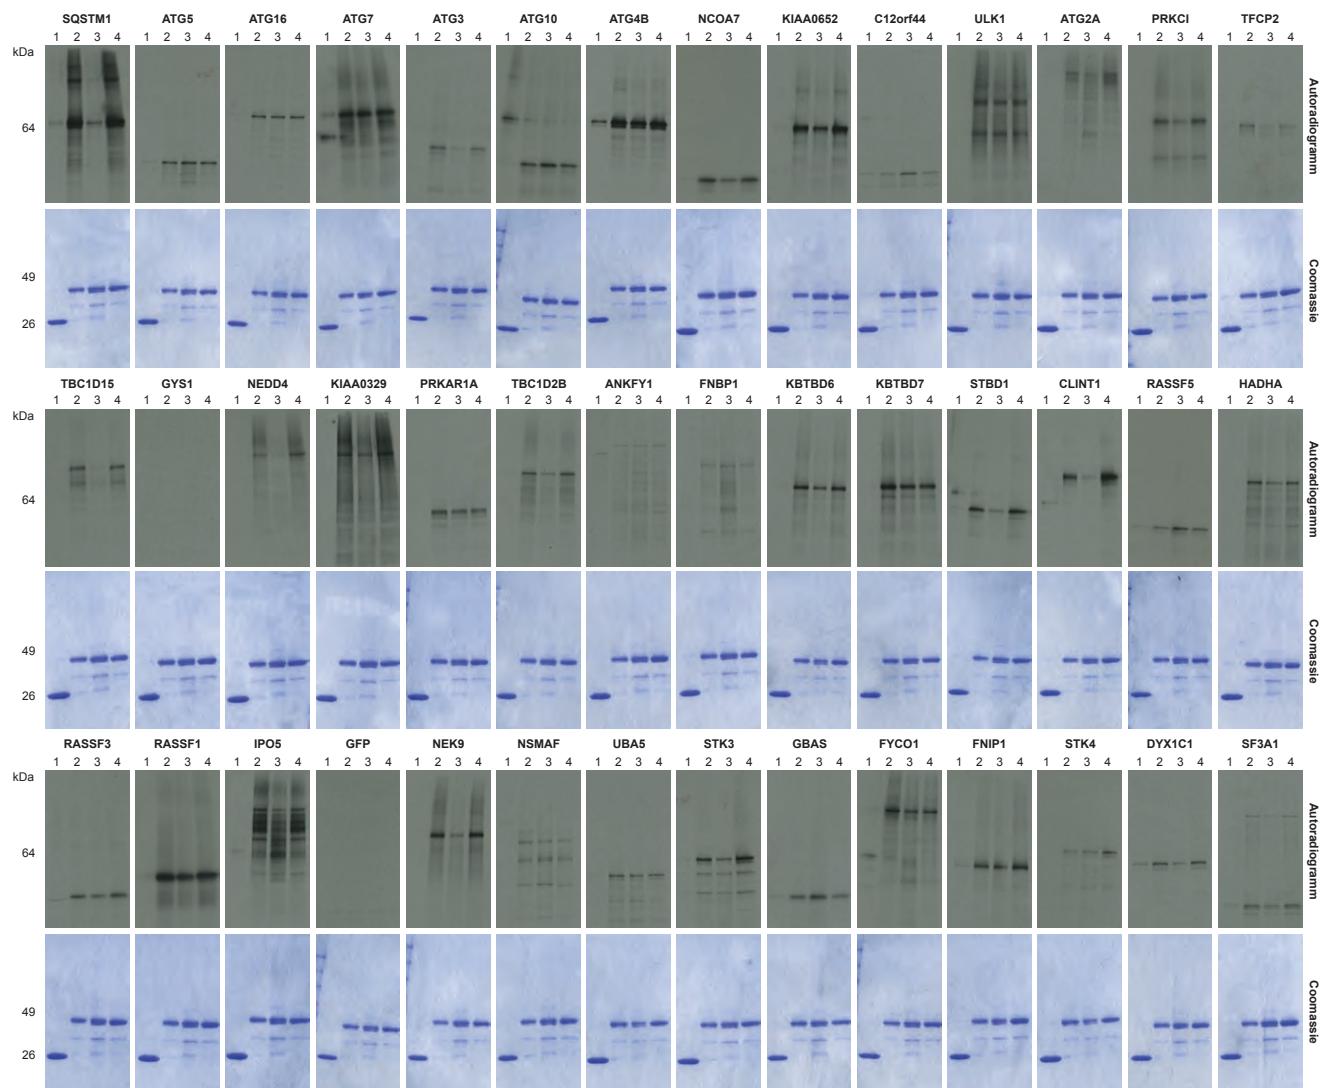



Supplementary Fig. S11b

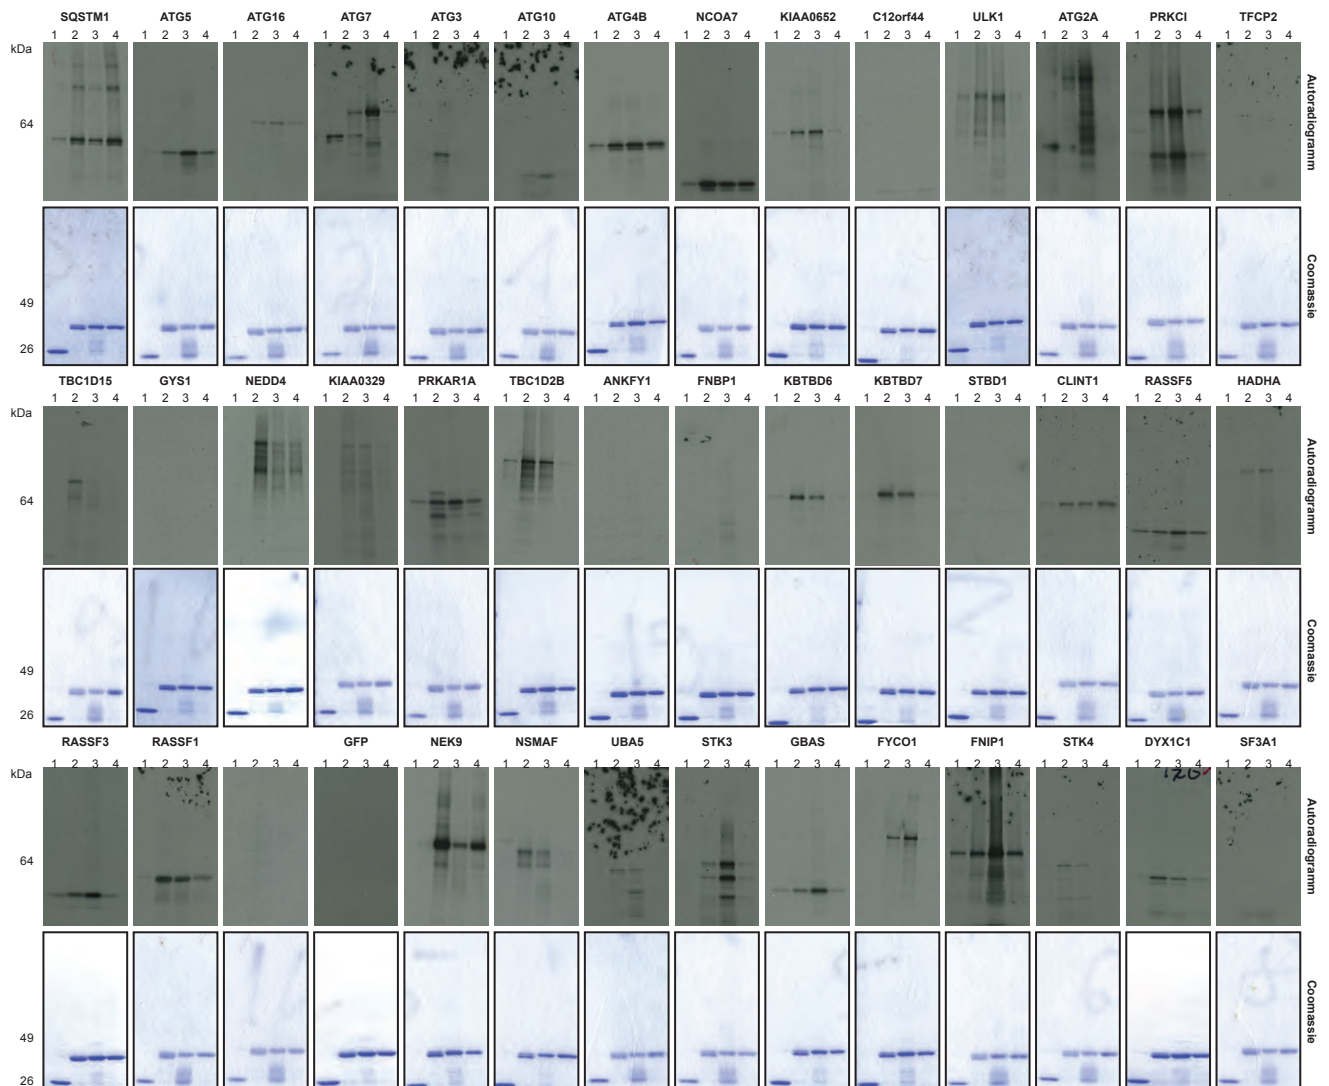

Supplementary Fig. S11c

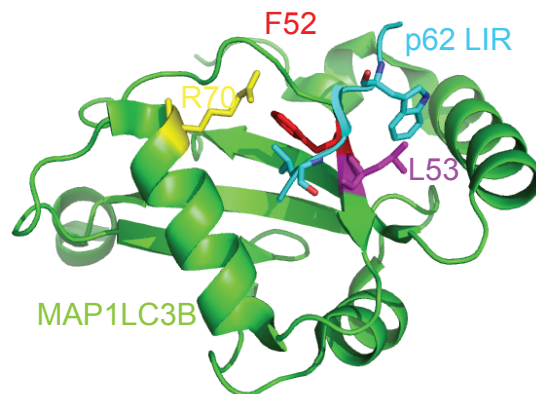

Supplementary Fig. S11d

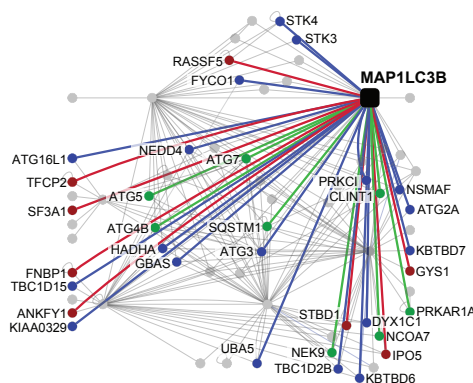

|          | Binding dependent on |          |
|----------|----------------------|----------|
|          | Y52A/L53A            | R70A     |
| MAP1LC3B | ATG3                 | ATG3     |
|          | DYX1C1               | DYX1C1   |
|          | KBTBD6               | KBTBD6   |
|          | KBTBD7               | KBTBD7   |
|          | NEDD4                | NEDD4    |
|          | NSMAF                | NSMAF    |
|          | TBC1D15              | TBC1D15  |
|          | NEK9                 |          |
|          | SQSTM1               |          |
|          |                      | ATG16L1  |
|          |                      | ATG2A    |
|          |                      | FYCO1    |
|          |                      | GBAS     |
|          |                      | HADHA    |
|          |                      | KIAA0329 |
|          |                      | PRKCI    |
|          |                      | STK3     |
|          | STK4                 |          |
|          | TBC1D2B              |          |
|          | UBA5                 |          |

Supplementary Fig. S11e

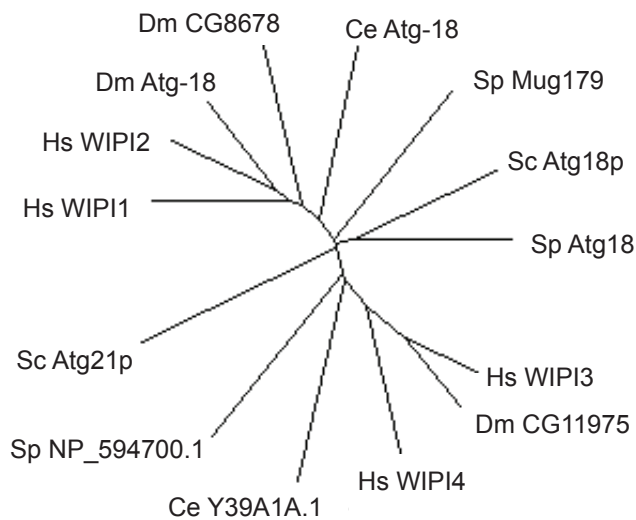

**Figure S11. LIR-dependence of interactions between GST-ATG8 proteins and in vitro translated HCIPs.** **a**, Immobilized GST (lane 1), GST-GABARAP (lane 2), GST-GABARAP Y49A/L50A (lane 3) or GST-GABARAP R70A (lane 4) were analyzed for binding with the indicated HCIPs as described in Figure S10. **b**, Immobilized GST (lane 1), GST-MAP1LC3B (lane 2), GST-MAP1LC3B F52A/L53A (lane 3) or GST-MAP1LC3B R70A (lane 4) were analyzed for binding with the indicated HCIPs as described in Figure S10. **c**, Structure of the SQSTM1 (p62) LIR-motif (cyan) bound to the LDS of MAP1LC3B (green) (pdb code: 2K6Q). Mutations employed in the experiments in panel **b** are shown: R70A (yellow), F52A (red), L53A (purple). **d**, Effect of the R70A mutation in MAP1LC3B on interaction with the ATG8 sub-network. Red edges, no interaction; green edges, interaction unaffected; blue edges, interaction reduced or eliminated. **e**, Phylogenetic tree for Atg18p and Atg21p related proteins from humans (Hs), *S. pombe* (Sp), *C. elegans* (Ce), *Drosophila* (Dm), and *S. cerevisiae* (Sc).

| Delta Glycine |         |           |           |          |          |
|---------------|---------|-----------|-----------|----------|----------|
| HCIP/BAIT     | GABARAP | GABARAPL1 | GABARAPL2 | MAP1LC3B | MAP1LC3A |
| ANKFY1        |         |           | -4.68     |          |          |
| ATG16L1       |         |           | -5.68     |          |          |
| ATG3          | -7.72   | -7.89     | -8.16     | -10.09   | -8.02    |
| ATG4B         | 11.60   | 12.95     | -7.76     | -6.45    | 9.64     |
| ATG5          |         |           |           |          |          |
| ATG7          | -10.97  | -10.74    | -9.87     | -9.94    | -10.56   |
| BRWD2         |         | -4.92     |           |          | 5.06     |
| CLINT1        |         |           |           |          | 8.03     |
| CLTA          |         |           |           |          | 7.54     |
| CLTC          | 6.26    | -5.23     | -5.75     | -5.61    | 8.85     |
| CUL3          | -6.01   | -6.60     | -3.51     |          | 5.73     |
| DYX1C1        | -4.36   |           |           |          |          |
| FYCO1         |         |           |           | 10.32    | 10.37    |
| GABARAP       |         | -8.16     | 6.50      |          | -8.44    |
| GABARAPL2     | 5.82    | 9.51      |           |          | -8.44    |
| GBAS          | -9.70   | 7.87      | -5.79     | 8.48     | 9.47     |
| GYS1          | -8.11   | -3.38     | -7.71     |          |          |
| HADHA         |         | -4.79     |           |          |          |
| HADHB         | -9.70   | -6.09     | 7.04      | 9.35     | 9.20     |
| KBTBD6        | -9.85   | -8.82     | 2.93      | 9.33     | 8.74     |
| KEAP1         | 2.29    | -4.79     | 5.25      |          |          |
| LLGL1         | -7.87   | 4.51      | 7.41      | 7.50     | 6.42     |
| MAP1A         |         |           |           |          |          |
| MAP1B         | -4.95   |           | 4.59      |          | 5.26     |
| MAP1LC3A      |         |           |           | -6.28    | -6.99    |
| MAP1LC3B      |         |           | 4.69      | -8.18    | 8.57     |
| MAP1LC3C      |         |           | 7.68      | 8.67     |          |
| NBR1          | 7.95    | 8.24      |           |          |          |
| NCOA7         |         | -4.22     | 6.19      |          |          |
| NEDD4         | -6.13   | -5.30     |           |          |          |
| NEK9          | -8.84   | -8.12     | -7.42     |          | 7.35     |
| NIPSNAP1      | -7.21   | -5.93     | -6.56     |          | 6.38     |
| NSMAF         | -6.54   | 7.52      | 6.22      | 8.49     | 7.16     |
| PDCD6P        | -5.75   |           |           |          | 7.06     |
| PIK3C3        |         |           |           |          | -5.54    |
| PIK3R4        |         |           |           |          |          |
| PRKCI         |         |           |           |          |          |
| PTPLAD1       | -5.64   | 4.64      | 5.74      | 8.20     | 7.09     |
| RAB3GAP1      | -8.05   | -7.96     | 6.83      | 7.10     | 9.09     |
| RAB3GAP2      |         |           |           |          | 5.36     |
| RANBP5        | -5.57   |           |           |          | 9.63     |
| RASSF5        | -8.31   | -8.22     | -7.19     |          |          |
| RB1CC1        |         |           |           | -5.53    |          |
| RCN2          |         |           |           |          |          |
| SAFB2         | -7.97   | -7.80     | -2.32     |          |          |
| SF3A1         |         |           |           | -6.49    | -7.74    |
| SQSTM1        |         |           |           |          | -4.68    |
| STBD1         | -10.72  | -9.00     | -8.00     | 9.89     | 8.60     |
| STK3          |         |           |           | -5.22    | -10.19   |
| STK4          |         |           |           | -7.59    | -7.39    |
| TBC1D15       | -5.58   |           |           |          |          |
| TBC1D2B       |         | -6.47     | -5.16     |          |          |
| TFCP2         |         |           |           |          |          |
| TMEM160       | -10.63  | -8.83     | 8.89      | 6.90     | 10.57    |
| UBA5          |         |           | 6.94      |          |          |
| WDR62         |         |           | 8.52      |          |          |

**Figure S12. Proteomic analysis of the ATG8 sub-network: Effect of C-terminal glycine on protein interactions *in vivo*.** Effect of deletion of the C-terminal glycine residue from ATG8 proteins. The primary data is provided in Supplemental Table S3a and S3b. The indicated ATG8 proteins or their C-terminal  $\Delta$ Gly counterparts, were purified from 293T cells and subjected to LC-MS/MS. TSCs were used to calculate differential interaction scores using a modified version of the NSAF method (see Detailed Methods for method of the scoring). Only scores for proteins that passed the stringent threshold for statistical significance are highlighted (red, increased abundance; blue, decreased abundance).

## Supplementary Fig. S13

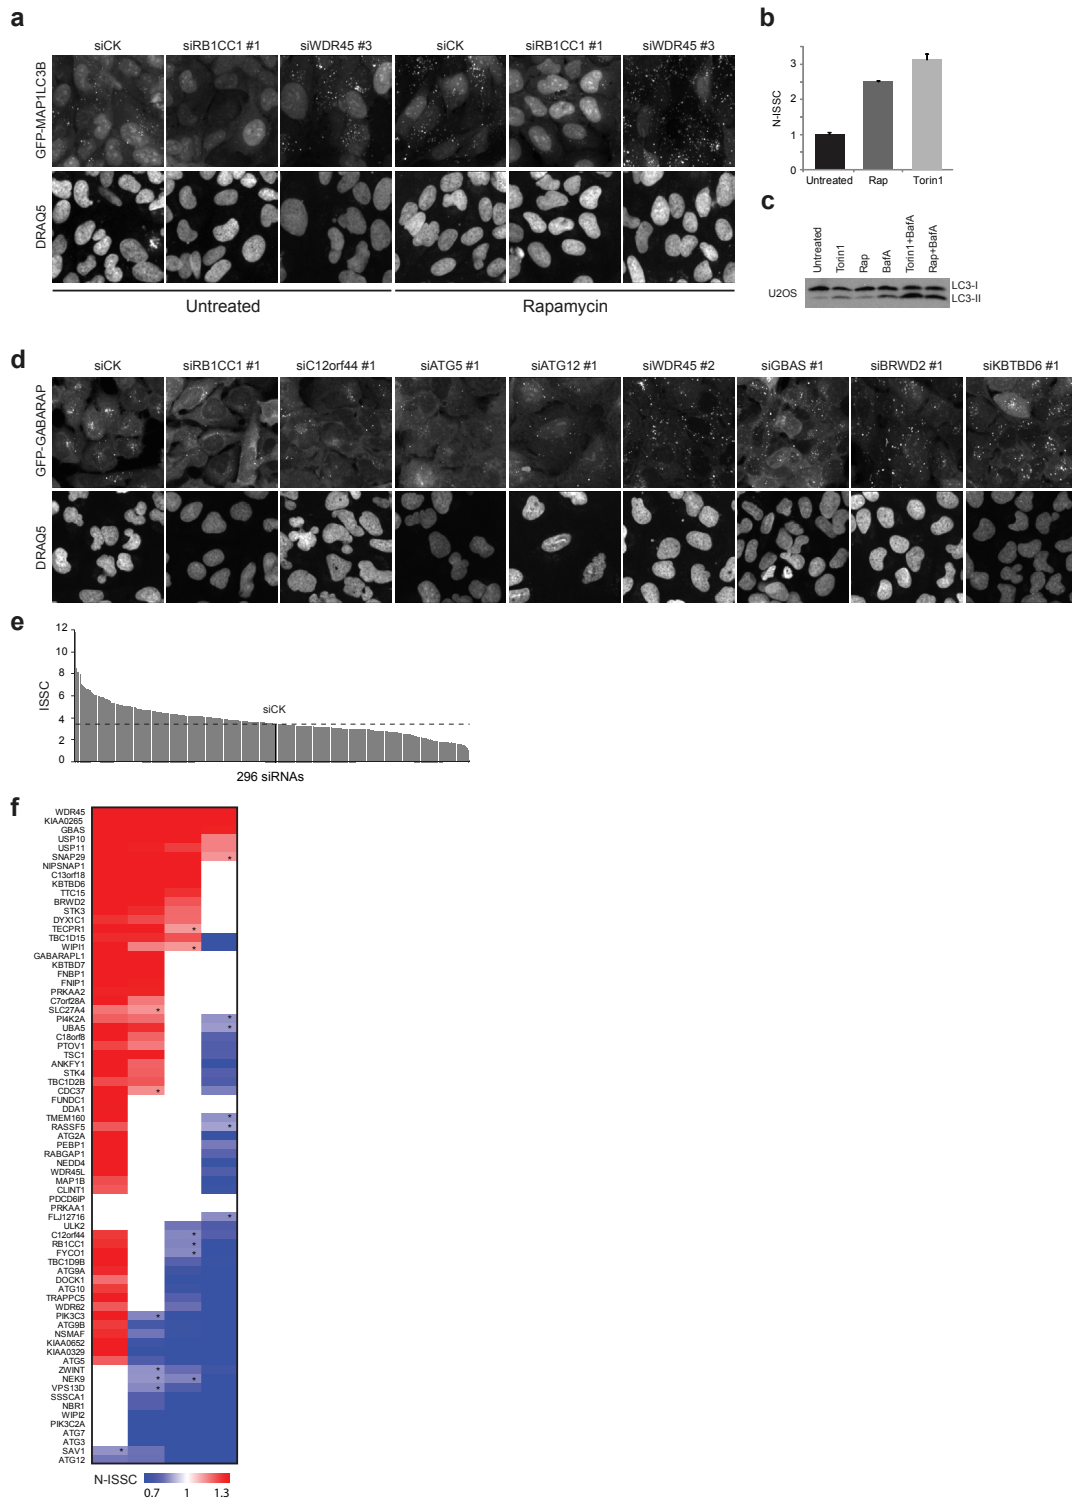

## Supplementary Fig. S13g

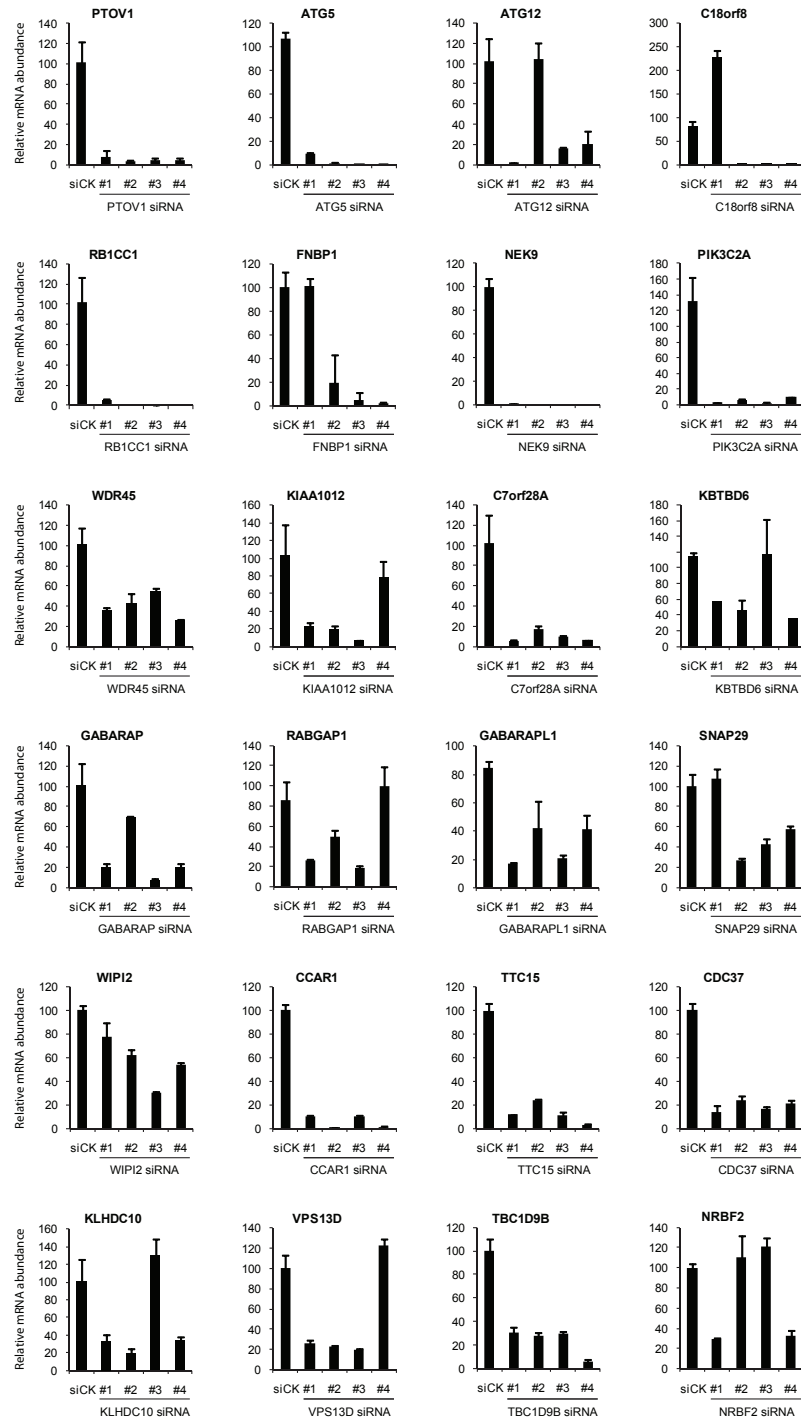

## Supplementary Fig. S13h

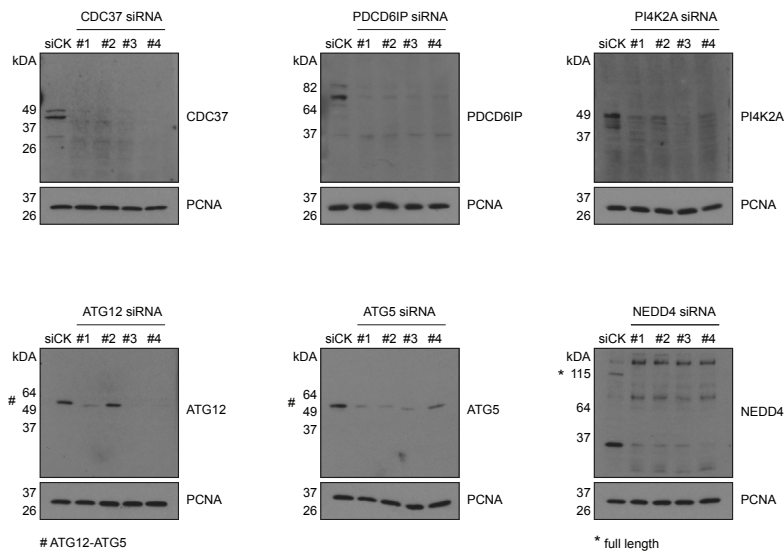

## Supplementary Fig. S13i

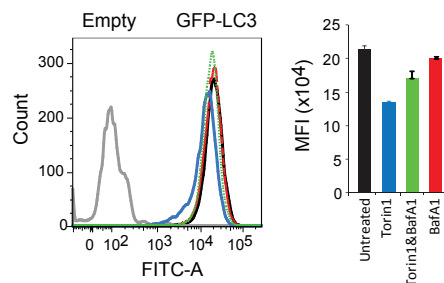

**Figure S13. RNAi analysis of genes in the autophagy interaction network.** **a**, Representative images of GFP-MAPLC3B expressing U2OS cells after transfection with the indicated siRNAs in the presence and absence of Rapamycin (200 nM, 6h). DRAQ5 is used to mark nuclei. The GFP images are the same as those used in Fig. 5a in the main paper. **b**, Normalized integrated spot signal per cell (N-ISSC) for U2OS cells expressing GFP-MAP1LC3B either alone or 6 h after treatment with rapamycin or Torin1 (200 nM). **c**,  $\alpha$ -LC3 blot of U2OS cells with the indicated treatments. **d**, Representative images of GFP-GABARAP expressing U2OS cells after transfection with the indicated siRNAs in the presence. DRAQ5 is used to mark nuclei. **e**, ISSC values for cells transfected with 296 siRNAs targeting 74 genes. **f**, Normalized ISSC (N-ISSC) for GFP-GABARAP with or without Rapamycin (6 h) (4 siRNAs/gene). Unless noted otherwise,  $p < 0.01$  using Students T-test; \*,  $p < 0.05$ ; white rectangles,  $p > 0.05$ . **g**, Quantitative RT-PCR results for depletion of the indicated genes in U2OS cells. Error bars, Standard Deviation,  $n = 3$ . **h**, Validation of siRNA mediated depletion of CDC37, PDCD6IP, PI4K2A, ATG12, ATG5, and NEDD4. Four siRNAs targeting the indicated genes were transfected into U2OS cells and after 72 h, cells were lysed and probed with antibodies against the indicated proteins. Blots were re-probed with PCNA as a loading control. All antibodies were from Cell Signaling Technologies, with the exception of anti-PI4K2A, which was from Novus. **i**, Validation of flow cytometry flux assay. Color-coding for histogram and bar-graph correspond. GFP-MAP1LC3B U2OS cells or empty U2OS cells were subjected to flow cytometry. The mean fluorescence intensity (MFI) was determined using FLOWJO. Torin1 activated flux through the autophagy pathway and this was reversed by BafA1 treatment. Error bars, Standard Deviation,  $n = 2$ .
